# Supplementary material for: Deoxycholic acid exacerbates intestinal inflammation by modulating interleukin-1β expression and tuft cell proportion in dextran sulfate sodium-induced murine colitis
Source: PubMed Central journal article supplement (PMC9938654; doi:10.7717/peerj.14842), 2023-02-15
Supplement: peerj-11-14842-s005.pdf [file peerj-11-14842-s005.pdf]

Figure1

| Group | CA   | DCA   | CDCA | UDCA | LCA   | GCA  | GDCA |
|-------|------|-------|------|------|-------|------|------|
| A-CD  | 3.03 | 0.795 | 23.4 | 0    | 0     | 74.8 | 0    |
| A-CD  | 3.98 | 419   | 104  | 27.4 | 25.6  | 86.9 | 182  |
| A-CD  | 4.18 | 5.22  | 63.9 | 4.32 | 0.8   | 86.8 | 0    |
| A-CD  | 4.34 | 2090  | 124  | 341  | 84.9  | 6.31 | 45.9 |
| A-CD  | 4.4  | 0     | 54.2 | 1.89 | 0     | 30.8 | 0    |
| A-CD  | 5.94 | 4.77  | 13.8 | 3.49 | 0.269 | 248  | 0    |
| A-CD  | 6.08 | 62.3  | 77.4 | 86.3 | 0     | 7.05 | 33   |
| A-CD  | 6.88 | 1.47  | 46   | 3.95 | 0     | 99.5 | 0    |
| A-CD  | 7.5  | 2     | 285  | 31.7 | 0     | 134  | 0    |
| A-CD  | 7.93 | 104   | 40.7 | 0    | 5.04  | 168  | 219  |
| A-CD  | 8.75 | 141   | 34.8 | 35.7 | 4.6   | 96.6 | 45.5 |
| A-CD  | 8.8  | 0.738 | 20.2 | 0    | 0     | 2190 | 0    |
| A-CD  | 10.5 | 5.78  | 18.7 | 0    | 0     | 74.3 | 0    |
| A-CD  | 11.4 | 0     | 101  | 137  | 0     | 25   | 0    |
| A-CD  | 12.5 | 0     | 43.1 | 0.58 | 0     | 60.8 | 0    |
| A-CD  | 13.2 | 0.39  | 59.6 | 47.1 | 3.05  | 242  | 0    |
| A-CD  | 13.7 | 0     | 127  | 25   | 0     | 188  | 0    |
| A-CD  | 13.8 | 44.5  | 150  | 12.8 | 0     | 274  | 248  |
| A-CD  | 16   | 1.33  | 110  | 3.45 | 0     | 280  | 0    |
| A-CD  | 17.6 | 1.91  | 527  | 110  | 0     | 18   | 0    |
| A-CD  | 17.8 | 88.7  | 34.9 | 11.5 | 0     | 65.7 | 32.9 |
| A-CD  | 17.9 | 144   | 119  | 38.4 | 18.8  | 90.3 | 109  |
| A-CD  | 18.2 | 0     | 154  | 34.2 | 2.49  | 66.6 | 0    |
| A-CD  | 18.5 | 0     | 16.1 | 5.68 | 0     | 220  | 0    |
| A-CD  | 18.7 | 62    | 29.9 | 39.4 | 4.04  | 219  | 111  |
| A-CD  | 20.5 | 155   | 20   | 31.5 | 1.62  | 88.2 | 107  |
| A-CD  | 22   | 0     | 28.4 | 0    | 0     | 245  | 0    |
| A-CD  | 23.4 | 0.486 | 149  | 0    | 0.756 | 137  | 0    |
| A-CD  | 23.7 | 30.8  | 151  | 77.8 | 0     | 135  | 14.2 |
| A-CD  | 23.9 | 124   | 85   | 13.7 | 4.07  | 53.7 | 42.8 |
| A-CD  | 27.9 | 1.26  | 133  | 58   | 0     | 206  | 0    |
| A-CD  | 28.1 | 45.3  | 384  | 358  | 0     | 45.3 | 0    |
| A-CD  | 30.1 | 3.42  | 136  | 0    | 0.75  | 122  | 0    |
| A-CD  | 31.2 | 1.33  | 155  | 139  | 0     | 86.7 | 0    |
| A-CD  | 31.6 | 5.03  | 129  | 32.2 | 13.1  | 476  | 0    |
| A-CD  | 35.2 | 2.94  | 507  | 1.33 | 0     | 144  | 0    |
| A-CD  | 36.2 | 8.96  | 797  | 3.76 | 0     | 241  | 0    |
| A-CD  | 36.5 | 1.2   | 302  | 5.78 | 0     | 261  | 2.68 |
| A-CD  | 37.4 | 2590  | 37.1 | 47.3 | 15    | 0    | 51.7 |
| A-CD  | 40.1 | 14    | 314  | 4.85 | 0     | 184  | 0    |
| A-CD  | 45.3 | 3.25  | 197  | 206  | 1.82  | 153  | 0    |
| A-CD  | 48.7 | 2.37  | 477  | 587  | 1.84  | 19.1 | 0    |
| A-CD  | 49.3 | 295   | 347  | 67   | 0.144 | 54.9 | 18.9 |
| A-CD  | 70   | 0     | 162  | 1.06 | 3.59  | 223  | 0.91 |
| A-CD  | 79.1 | 27.1  | 347  | 444  | 0     | 125  | 22.4 |
| A-CD  | 84.8 | 0     | 89.4 | 38.4 | 0     | 2720 | 0    |
| A-CD  | 86   | 17.1  | 376  | 17.9 | 0     | 370  | 0    |
| A-CD  | 114  | 0     | 550  | 0.12 | 0     | 498  | 0    |
| A-CD  | 132  | 0     | 211  | 25.8 | 0     | 105  | 0    |
| A-CD  | 151  | 0     | 1190 | 80.2 | 0     | 50.8 | 1.15 |
| A-CD  | 154  | 3.8   | 535  | 23.5 | 0     | 559  | 0    |
| A-CD  | 155  | 0     | 2880 | 41.2 | 0     | 95.9 | 0    |
| A-CD  | 168  | 0     | 307  | 2.26 | 0     | 885  | 0    |
| A-CD  | 198  | 204   | 544  | 46   | 5.02  | 232  | 167  |
| A-CD  | 199  | 0.573 | 387  | 0    | 0     | 4950 | 0    |
| A-CD  | 225  | 0     | 871  | 0    | 0     | 568  | 0    |

|       |      |       |       |      |       |      |      |
|-------|------|-------|-------|------|-------|------|------|
| A-CD  | 234  | 2.89  | 20.1  | 0    | 0     | 291  | 8.45 |
| A-CD  | 245  | 2.25  | 564   | 49   | 0     | 207  | 0    |
| A-CD  | 367  | 55.1  | 2910  | 842  | 0     | 927  | 3.18 |
| A-CD  | 391  | 0     | 471   | 0    | 0     | 370  | 0.06 |
| A-CD  | 464  | 0.09  | 1060  | 44.6 | 0     | 146  | 2.96 |
| A-CD  | 578  | 4.37  | 6790  | 198  | 0     | 67.4 | 0    |
| A-CD  | 620  | 756   | 2600  | 121  | 3.27  | 174  | 96.3 |
| A-CD  | 621  | 0     | 1430  | 16.8 | 2.48  | 131  | 0    |
| A-CD  | 1130 | 560   | 2150  | 82.7 | 2.42  | 107  | 89   |
| A-CD  | 4580 | 4860  | 16600 | 54.6 | 0     | 135  | 299  |
| Re-CD | 2.3  | 74.6  | 3.25  | 4.74 | 0     | 13.1 | 5.67 |
| Re-CD | 2.37 | 2.86  | 10.4  | 0    | 0.317 | 2770 | 0    |
| Re-CD | 3.95 | 8.86  | 0     | 0    | 4.56  | 3770 | 0    |
| Re-CD | 4.5  | 0     | 47.4  | 0    | 0     | 65.2 | 0    |
| Re-CD | 6.43 | 0.937 | 67.2  | 0    | 0     | 454  | 0    |
| Re-CD | 7.56 | 74.1  | 92.5  | 20.9 | 0     | 258  | 195  |
| Re-CD | 7.61 | 65.8  | 117   | 249  | 14.2  | 20.3 | 0    |
| Re-CD | 9.2  | 865   | 48.6  | 240  | 31.2  | 15.4 | 119  |
| Re-CD | 9.31 | 9.58  | 110   | 3.36 | 0     | 57.3 | 14.5 |
| Re-CD | 9.44 | 11.9  | 47.3  | 10.9 | 0     | 302  | 0    |
| Re-CD | 11.6 | 0     | 56    | 34.3 | 0     | 80.6 | 0    |
| Re-CD | 12.7 | 0     | 70.8  | 7.83 | 0     | 236  | 0    |
| Re-CD | 16.1 | 28.5  | 58.6  | 9.05 | 3.68  | 125  | 102  |
| Re-CD | 16.7 | 0     | 39.5  | 21.8 | 0     | 28.2 | 0    |
| Re-CD | 17.2 | 348   | 212   | 150  | 25    | 470  | 762  |
| Re-CD | 17.8 | 480   | 249   | 78.1 | 42.4  | 73.6 | 437  |
| Re-CD | 19.2 | 20.4  | 493   | 40.1 | 0.18  | 207  | 18.4 |
| Re-CD | 20.1 | 2.73  | 45.6  | 2.74 | 0     | 258  | 0    |
| Re-CD | 20.7 | 9.72  | 229   | 34.2 | 0     | 63.3 | 0    |
| Re-CD | 22.6 | 2.23  | 107   | 5.56 | 0     | 361  | 0    |
| Re-CD | 23.7 | 0     | 93.7  | 1.62 | 0     | 249  | 4.82 |
| Re-CD | 25.1 | 0.227 | 25.1  | 6.74 | 0     | 385  | 0    |
| Re-CD | 25.9 | 2.23  | 1360  | 56.1 | 0     | 90.5 | 0    |
| Re-CD | 29.8 | 3.41  | 174   | 0    | 0     | 36.6 | 0    |
| Re-CD | 29.8 | 2.26  | 31.5  | 0    | 0     | 41.9 | 0    |
| Re-CD | 41.1 | 1.24  | 758   | 27.3 | 0     | 49.6 | 0    |
| Re-CD | 48   | 163   | 123   | 34   | 2.61  | 245  | 101  |
| Re-CD | 49.9 | 2.78  | 538   | 236  | 0     | 224  | 2.35 |
| Re-CD | 53.8 | 153   | 345   | 27.9 | 0     | 101  | 110  |
| Re-CD | 63.5 | 0     | 587   | 2.53 | 0     | 249  | 0    |
| Re-CD | 63.6 | 0.82  | 658   | 177  | 13.6  | 15.9 | 0    |
| Re-CD | 64.4 | 16.1  | 132   | 76.2 | 0     | 175  | 0    |
| Re-CD | 64.9 | 7.03  | 411   | 73   | 2.22  | 73.2 | 0    |
| Re-CD | 77   | 150   | 383   | 201  | 0     | 90.9 | 61.7 |
| Re-CD | 98.9 | 0.24  | 141   | 0    | 0.48  | 489  | 0    |
| Re-CD | 99.7 | 0     | 1190  | 924  | 0     | 258  | 0    |
| Re-CD | 106  | 13.3  | 806   | 95.1 | 0     | 134  | 1.76 |
| Re-CD | 115  | 1.73  | 778   | 314  | 0.362 | 126  | 0    |
| Re-CD | 119  | 6.36  | 2790  | 364  | 0     | 90   | 0    |
| Re-CD | 149  | 148   | 224   | 71   | 0     | 28.2 | 47.8 |
| Re-CD | 149  | 6.44  | 1100  | 107  | 1.77  | 348  | 0    |
| Re-CD | 160  | 3.1   | 404   | 37.2 | 0     | 105  | 0    |
| Re-CD | 165  | 3.96  | 743   | 66.8 | 0     | 80.2 | 0    |
| Re-CD | 191  | 5.2   | 1510  | 701  | 0     | 71.1 | 0    |
| Re-CD | 213  | 91.9  | 855   | 166  | 0     | 203  | 95.9 |
| Re-CD | 269  | 12.1  | 2180  | 69.1 | 0     | 94.1 | 0    |
| Re-CD | 308  | 10.9  | 1080  | 58.5 | 0     | 38.2 | 0    |
| Re-CD | 374  | 15.7  | 7420  | 3740 | 0     | 93.8 | 0    |

|       |      |       |       |      |       |      |         |
|-------|------|-------|-------|------|-------|------|---------|
| Re-CD | 404  | 1370  | 1040  | 214  | 7.77  | 46.2 | 188     |
| Re-CD | 430  | 11.1  | 2080  | 662  | 0     | 487  | 3.35    |
| Re-CD | 481  | 605   | 603   | 47.1 | 0.9   | 44.3 | 80.6    |
| Re-CD | 562  | 12.4  | 3120  | 268  | 0     | 606  | 0       |
| Re-CD | 649  | 315   | 3900  | 134  | 0     | 889  | 289     |
| Re-CD | 719  | 0     | 1990  | 839  | 0     | 75.4 | 0       |
| Re-CD | 802  | 7.33  | 5030  | 262  | 0     | 19.1 | 0       |
| Re-CD | 849  | 34.1  | 2980  | 353  | 0     | 98.8 | 0.00796 |
| Re-CD | 1020 | 32.7  | 3500  | 764  | 0     | 188  | 8.73    |
| Re-CD | 3110 | 0     | 5120  | 661  | 1.21  | 2460 | 0       |
| Re-CD | 5000 | 0     | 17500 | 456  | 0     | 153  | 0       |
| Re-CD | 7430 | 7210  | 8240  | 1020 | 0.54  | 912  | 879     |
| A-UC  | 9.14 | 14.9  | 82.6  | 2.43 | 0     | 290  | 4.57    |
| A-UC  | 13.4 | 3.44  | 26.1  | 20.9 | 0     | 108  | 23      |
| A-UC  | 13.6 | 37.5  | 56.5  | 7.35 | 0     | 82   | 66.5    |
| A-UC  | 17.2 | 0     | 11.1  | 5.98 | 0     | 52.2 | 4.46    |
| A-UC  | 19.6 | 36.4  | 39.3  | 19.9 | 1.38  | 133  | 57.9    |
| A-UC  | 19.8 | 401   | 64.6  | 48.7 | 3.13  | 103  | 75.8    |
| A-UC  | 20   | 39.9  | 39.9  | 20   | 29.9  | 30.1 | 10      |
| A-UC  | 20.2 | 12.7  | 51.2  | 11.2 | 0     | 439  | 12.1    |
| A-UC  | 22.8 | 50.7  | 132   | 11.5 | 0     | 251  | 11.4    |
| A-UC  | 30   | 61.4  | 159   | 42.6 | 0     | 77.4 | 17.2    |
| A-UC  | 30.5 | 141   | 193   | 88.6 | 4.96  | 117  | 51.3    |
| A-UC  | 30.5 | 202   | 238   | 30.9 | 2.38  | 332  | 190     |
| A-UC  | 31.9 | 0.244 | 17.1  | 0    | 4.36  | 365  | 1.31    |
| A-UC  | 34.1 | 14.3  | 30.1  | 0    | 0.166 | 220  | 44      |
| A-UC  | 36   | 8.81  | 47.4  | 3.47 | 0     | 116  | 26      |
| A-UC  | 41.1 | 35.6  | 1140  | 45.7 | 3.08  | 785  | 137     |
| A-UC  | 65   | 3.44  | 78.9  | 118  | 0     | 324  | 0       |
| A-UC  | 122  | 16.5  | 322   | 47.7 | 0     | 80.5 | 0       |
| A-UC  | 132  | 10.5  | 851   | 467  | 0     | 97.3 | 0       |
| A-UC  | 142  | 1.16  | 208   | 9.43 | 0     | 285  | 0       |
| A-UC  | 221  | 10.9  | 744   | 5.75 | 6.34  | 282  | 0       |
| A-UC  | 277  | 8.46  | 4660  | 892  | 0     | 529  | 0       |
| A-UC  | 326  | 0     | 672   | 254  | 0     | 217  | 0       |
| A-UC  | 1310 | 12.3  | 2240  | 20.4 | 0.059 | 314  | 0       |
| A-UC  | 1750 | 59.9  | 1790  | 13.7 | 0     | 731  | 19.7    |
| A-UC  | 4320 | 2.8   | 5460  | 326  | 0     | 324  | 0       |
| Re-UC | 5.18 | 38    | 22.9  | 4.41 | 0     | 23.2 | 11.6    |
| Re-UC | 5.32 | 0     | 33.3  | 0    | 0     | 22.3 | 0       |
| Re-UC | 22.3 | 109   | 419   | 258  | 0     | 28.6 | 19.1    |
| Re-UC | 81.9 | 31.6  | 331   | 69.5 | 1.61  | 71.9 | 15.5    |
| Re-UC | 882  | 635   | 1620  | 174  | 0     | 165  | 178     |
| HC    | 7.35 | 8.02  | 40    | 8.61 | 0     | 38.3 | 13.3    |
| HC    | 8.18 | 0     | 84.2  | 4.21 | 0     | 67.2 | 0       |
| HC    | 8.99 | 287   | 139   | 85.6 | 14.3  | 122  | 101     |
| HC    | 10.5 | 81.8  | 39    | 8.22 | 0     | 11.2 | 26.2    |
| HC    | 12.7 | 36.6  | 39.5  | 8.17 | 0     | 30.7 | 8.98    |
| HC    | 13.9 | 41.2  | 195   | 43.4 | 9.06  | 64.6 | 24.6    |
| HC    | 16.3 | 16.5  | 27    | 3.48 | 0     | 138  | 0       |
| HC    | 16.9 | 11.9  | 39    | 2.14 | 0     | 33   | 0       |
| HC    | 17.4 | 369   | 203   | 193  | 19.2  | 77.1 | 80.5    |
| HC    | 18.2 | 288   | 43.3  | 111  | 26.3  | 140  | 338     |
| HC    | 18.4 | 26.7  | 272   | 109  | 2.46  | 98.7 | 0       |
| HC    | 19.4 | 135   | 90    | 13.5 | 43.2  | 42.1 | 61.5    |
| HC    | 19.5 | 41.9  | 41.5  | 5.43 | 3.7   | 138  | 89.3    |
| HC    | 20.4 | 72.9  | 68    | 11.4 | 4.08  | 97.1 | 70.7    |
| HC    | 20.5 | 26.3  | 93.1  | 5.95 | 0     | 1430 | 0       |

|    |      |      |       |      |       |      |      |
|----|------|------|-------|------|-------|------|------|
| HC | 21.6 | 223  | 90.4  | 21.8 | 15    | 297  | 171  |
| HC | 22.3 | 10.2 | 86.8  | 20   | 0     | 72.7 | 8.66 |
| HC | 22.5 | 104  | 90.6  | 18.1 | 2.27  | 64.2 | 25.2 |
| HC | 24.1 | 683  | 84.5  | 61.7 | 15.7  | 40.7 | 72   |
| HC | 25.2 | 16.7 | 308   | 39.2 | 1.36  | 163  | 9.18 |
| HC | 27.3 | 5.24 | 609   | 12.5 | 13    | 280  | 0    |
| HC | 27.8 | 394  | 423   | 71.1 | 34.5  | 431  | 378  |
| HC | 30.1 | 1.9  | 87.9  | 4.16 | 0     | 315  | 15.5 |
| HC | 31.7 | 271  | 168   | 48   | 4.98  | 13.7 | 10.1 |
| HC | 34.1 | 521  | 107   | 58.7 | 2.13  | 47.3 | 117  |
| HC | 34.3 | 676  | 101   | 97.1 | 35.1  | 73.3 | 61   |
| HC | 34.9 | 6.35 | 181   | 177  | 0     | 58.4 | 2.66 |
| HC | 35.4 | 134  | 367   | 57.2 | 7.45  | 67.3 | 84.2 |
| HC | 39.1 | 32.6 | 485   | 85.1 | 0     | 54   | 0    |
| HC | 39.4 | 12.8 | 172   | 5.46 | 6.81  | 41.3 | 3.89 |
| HC | 43.9 | 1080 | 423   | 203  | 33    | 54   | 54.8 |
| HC | 59.9 | 155  | 819   | 121  | 0     | 246  | 127  |
| HC | 61.9 | 3.23 | 558   | 6.33 | 0     | 156  | 0    |
| HC | 74.2 | 185  | 293   | 61.2 | 4.5   | 233  | 312  |
| HC | 75.9 | 8.04 | 212   | 21   | 0     | 556  | 0    |
| HC | 77.5 | 17   | 581   | 197  | 0     | 1510 | 37   |
| HC | 84.1 | 248  | 253   | 76.1 | 2.33  | 153  | 97.7 |
| HC | 90.2 | 17.7 | 1170  | 157  | 0     | 270  | 0    |
| HC | 105  | 121  | 171   | 16.6 | 2.82  | 120  | 42.1 |
| HC | 108  | 16.5 | 329   | 81.2 | 0     | 122  | 0    |
| HC | 119  | 7.37 | 453   | 453  | 0     | 586  | 1.42 |
| HC | 120  | 93.8 | 847   | 250  | 0     | 180  | 13   |
| HC | 128  | 519  | 394   | 111  | 2.94  | 611  | 593  |
| HC | 136  | 6.79 | 302   | 62.3 | 1.9   | 369  | 0    |
| HC | 138  | 16.5 | 180   | 18.8 | 16    | 88   | 27.4 |
| HC | 139  | 29.4 | 1060  | 139  | 0     | 204  | 5.59 |
| HC | 140  | 51.9 | 1010  | 211  | 0.772 | 298  | 19.4 |
| HC | 154  | 19.5 | 787   | 45.8 | 0     | 67.5 | 0    |
| HC | 169  | 173  | 2190  | 347  | 0     | 72.1 | 23.4 |
| HC | 177  | 116  | 1750  | 6.36 | 0     | 148  | 53.9 |
| HC | 180  | 791  | 663   | 83.8 | 4.98  | 87.1 | 259  |
| HC | 232  | 1.56 | 1390  | 33.1 | 0     | 118  | 0    |
| HC | 241  | 142  | 1800  | 527  | 2.11  | 115  | 31.9 |
| HC | 277  | 307  | 1520  | 635  | 0.906 | 971  | 469  |
| HC | 514  | 923  | 15400 | 1220 | 0     | 120  | 39.9 |
| HC | 566  | 1040 | 869   | 119  | 21.6  | 101  | 279  |
| HC | 2310 | 880  | 5200  | 530  | 0     | 242  | 90.8 |
| HC | 2650 | 963  | 1090  | 108  | 6.05  | 77   | 74.8 |

Figure2  
A and B

| Component          | CD         | CD          | CD        | CD        | CD       | HC       | HC       |
|--------------------|------------|-------------|-----------|-----------|----------|----------|----------|
| 12-ketolithochol   | 0          | 0           | 0         | 0         | 0        | 14704.19 | 96178.92 |
| 23-Norcholic aci   | 105.851612 | 372.5383902 | 20.678134 | 131.35412 | 33.09572 | 132.2494 | 348.0322 |
| 3-dehydrocholic    | 14657.4976 | 13208.89011 | 220.83987 | 1369.1451 | 0        | 5412.403 | 1895.466 |
| 3β -Ursodeoxychl   | 49736.9493 | 88415.96806 | 0         | 0         | 0        | 19823.12 | 13548.4  |
| 7-Ketolithocholic  | 175829.087 | 78465.09    | 396.38665 | 13379.963 | 0        | 13153.51 | 7972.099 |
| Allolithocholic ac | 0          | 108.1474723 | 0         | 0         | 0        | 814.5569 | 2252.324 |
| Alpha-Muricholic   | 153819.093 | 213235.4712 | 3455.2089 | 14531.758 | 0        | 103698.3 | 89501.02 |
| Chenodeoxychol     | 172328.815 | 77942.81188 | 0         | 199421.7  | 0        | 162911.9 | 108536.9 |
| Chenodeoxychol     | 0          | 0           | 0         | 11422.049 | 381.82   | 123.5983 | 287.1699 |
| Cholic acid        | 311814.424 | 401673.7442 | 8795.468  | 384355.22 | 393.9938 | 202371   | 139263.4 |
| Deoxycholic acid   | 44350.0442 | 871.5328809 | 0         | 3119.211  | 0        | 156282.8 | 1091439  |

|                    |            |             |           |           |          |          |          |
|--------------------|------------|-------------|-----------|-----------|----------|----------|----------|
| Glycochenodeox     | 1769.99503 | 4702.270701 | 0         | 17495.73  | 72321.29 | 1105.701 | 701.9937 |
| Glycocholic acid   | 2259.10739 | 1777.469675 | 217.10911 | 27495.156 | 41965.25 | 200.0936 | 229.865  |
| Glycodeoxycholi    | 113.715199 | 0           | 0         | 186.25633 | 0        | 90.37489 | 113.7885 |
| Glycohyocholic a   | 608.691641 | 1250.746366 | 0         | 0         | 0        | 367.9936 | 319.9629 |
| Glycolithocholic   | 0          | 0           | 0         | 0         | 0        | 0        | 0        |
| Glycoursodeoxyc    | 218.465249 | 1777.046865 | 71.668759 | 9679.1922 | 1373.574 | 87.42909 | 36.4058  |
| Hyodeoxycholic     | 187098.386 | 304417.9456 | 1398.3987 | 90388.805 | 0        | 81424.67 | 44961.16 |
| Isolithocholic aci | 0          | 58.92062998 | 0         | 0         | 0        | 684.5562 | 1412.2   |
| Tauro-alpha-Mu     | 1128.09798 | 306.7974228 | 0         | 0         | 276.0647 | 0        | 22.52876 |
| Taurochenodeox     | 905.144176 | 553.4076345 | 0         | 2134.4239 | 38908.02 | 70.99259 | 114.0643 |
| Taurocholic acid   | 4528.428   | 4750.23218  | 0         | 2660.9613 | 37414.11 | 258.127  | 101.8991 |
| Taurodeoxycholi    | 190.694169 | 0           | 0         | 0         | 0        | 32.26353 | 352.9418 |
| Taurohyocholic a   | 940.845122 | 0           | 0         | 567.37588 | 0        | 0        | 0        |
| Taurohyodeoxyc     | 410.892833 | 4088.822685 | 0         | 1951.4732 | 574.2682 | 50.21152 | 38.64357 |
| Taurolithocholic   | 0          | 36.09320752 | 0         | 0         | 0        | 0        | 25.67098 |
| Tauroursodeoxy     | 503.425104 | 4758.808358 | 0         | 2477.5937 | 644.3714 | 44.34081 | 31.80032 |
| Ursodeoxycholic    | 183459.774 | 309476.6297 | 1651.7902 | 87111.641 | 0        | 81995.81 | 44678.95 |
| lithocholic acid   | 3054.94809 | 5411.161354 | 1345.8104 | 312.12371 | 0        | 180882   | 1920430  |
| lithocholic acid 3 | 2232.01337 | 669.4268549 | 41.768811 | 2110.5652 | 26.5142  | 412.4944 | 104269.7 |

### A and B

| Component          | CD         | CD          | CD        | CD        | CD       | UC       | UC       |
|--------------------|------------|-------------|-----------|-----------|----------|----------|----------|
| Glycoursodeoxyc    | 218.465249 | 1777.046865 | 71.668759 | 9679.1922 | 1373.574 | 35.50731 | 0        |
| Tauroursodeoxy     | 503.425104 | 4758.808358 | 0         | 2477.5937 | 644.3714 | 251.8101 | 0        |
| Alpha-Muricholi    | 153819.093 | 213235.4712 | 3455.2089 | 14531.758 | 0        | 33804.45 | 0        |
| Taurohyodeoxyc     | 410.892833 | 4088.822685 | 0         | 1951.4732 | 574.2682 | 291.8574 | 0        |
| Hyodeoxycholic     | 187098.386 | 304417.9456 | 1398.3987 | 90388.805 | 0        | 523.5072 | 524.4229 |
| Ursodeoxycholic    | 183459.774 | 309476.6297 | 1651.7902 | 87111.641 | 0        | 570.141  | 631.0626 |
| lithocholic acid   | 3054.94809 | 5411.161354 | 1345.8104 | 312.12371 | 0        | 1107.316 | 309.3004 |
| Chenodeoxychol     | 0          | 0           | 0         | 11422.049 | 381.82   | 477.7987 | 1157.559 |
| Glycochenodeox     | 1769.99503 | 4702.270701 | 0         | 17495.73  | 72321.29 | 2188.936 | 950.5341 |
| Deoxycholic acid   | 44350.0442 | 871.5328809 | 0         | 3119.211  | 0        | 0        | 0        |
| Glycocholic acid   | 2259.10739 | 1777.469675 | 217.10911 | 27495.156 | 41965.25 | 1896.958 | 1410.624 |
| 3β-Ursodeoxych     | 49736.9493 | 88415.96806 | 0         | 0         | 0        | 0        | 0        |
| Tauro-alpha-Mu     | 1128.09798 | 306.7974228 | 0         | 0         | 276.0647 | 686.3799 | 0        |
| Allolithocholic ac | 0          | 108.1474723 | 0         | 0         | 0        | 0        | 0        |
| Glycolithocholic   | 0          | 0           | 0         | 0         | 0        | 0        | 0        |
| Isolithocholic aci | 0          | 58.92062998 | 0         | 0         | 0        | 0        | 0        |
| Taurolithocholic   | 0          | 36.09320752 | 0         | 0         | 0        | 0        | 0        |
| hyocholic acid     | 0          | 0           | 0         | 0         | 0        | 0        | 0        |
| 3-dehydrocholic    | 14657.4976 | 13208.89011 | 220.83987 | 1369.1451 | 0        | 4046.724 | 525.9642 |
| 23-Norcholeic aci  | 105.851612 | 372.5383902 | 20.678134 | 131.35412 | 33.09572 | 84.39245 | 239.3216 |
| Glycodeoxycholi    | 113.715199 | 0           | 0         | 186.25633 | 0        | 0        | 0        |
| Taurochenodeox     | 905.144176 | 553.4076345 | 0         | 2134.4239 | 38908.02 | 14728.46 | 318.2585 |
| Cholic acid        | 311814.424 | 401673.7442 | 8795.468  | 384355.22 | 393.9938 | 111193.1 | 246087.1 |
| lithocholic acid 3 | 2232.01337 | 669.4268549 | 41.768811 | 2110.5652 | 26.5142  | 346.4057 | 2268.315 |
| Chenodeoxychol     | 172328.815 | 77942.81188 | 0         | 199421.7  | 0        | 63113    | 15112.36 |
| 7-Ketolithocholic  | 175829.087 | 78465.09    | 396.38665 | 13379.963 | 0        | 33631.08 | 22719.48 |
| Taurodeoxycholi    | 190.694169 | 0           | 0         | 0         | 0        | 0        | 0        |
| Taurocholic acid   | 4528.428   | 4750.23218  | 0         | 2660.9613 | 37414.11 | 9117.967 | 4285.885 |
| Glycohyocholic a   | 608.691641 | 1250.746366 | 0         | 0         | 0        | 0        | 395.7623 |
| Taurohyocholic a   | 940.845122 | 0           | 0         | 567.37588 | 0        | 756.4199 | 0        |

### C

| OTU ID           | HC         | HC          | CD        | CD        | CD       | UC       | UC       |
|------------------|------------|-------------|-----------|-----------|----------|----------|----------|
| Actinobacteriota | 0.06456371 | 0.090548054 | 0.0204244 | 0.1719051 | 0.007489 | 0.033587 | 0.002269 |
| Bacteroidota     | 0.00896403 | 0.021332123 | 0.2444117 | 0.0224668 | 0.721207 | 0.000681 | 0.835697 |
| Cyanobacteria    | 0          | 0           | 0.003631  | 0         | 0        | 0.019744 | 0        |
| Firmicutes       | 0.86769545 | 0.855667764 | 0.4671508 | 0.7754454 | 0.068989 | 0.221037 | 0.120958 |
| Proteobacteria   | 0.05026665 | 0.032452059 | 0.2643822 | 0.0301827 | 0.202315 | 0.724952 | 0.041076 |

|                 |            |   |   |   |   |   |   |
|-----------------|------------|---|---|---|---|---|---|
| Unclassified    | 0          | 0 | 0 | 0 | 0 | 0 | 0 |
| Verrucomicrobic | 0.00851016 | 0 | 0 | 0 | 0 | 0 | 0 |

**D**

|                  | HC1        | HC2         | CD1       | CD2       | UC1      | UC2      | UC3      |
|------------------|------------|-------------|-----------|-----------|----------|----------|----------|
| OTU ID           | FC         | JJY         | WYX       | YYB       | YCS      | YT       | QBL      |
| Actinobacteriota | 0.06456371 | 0.090548054 | 0.0204244 | 0.1719051 | 0.033587 | 0.002269 | 0.201634 |
| Bacteroidota     | 0.00896403 | 0.021332123 | 0.2444117 | 0.0224668 | 0.000681 | 0.835697 | 0.09259  |
| Cyanobacteria    | 0          | 0           | 0.003631  | 0         | 0.019744 | 0        | 0        |
| Firmicutes       | 0.86769545 | 0.855667764 | 0.4671508 | 0.7754454 | 0.221037 | 0.120958 | 0.685351 |
| Proteobacteria   | 0.05026665 | 0.032452059 | 0.2643822 | 0.0301827 | 0.724952 | 0.041076 | 0.018722 |
| Unclassified     | 0          | 0           | 0         | 0         | 0        | 0        | 0.001702 |
| Verrucomicrobic  | 0.00851016 | 0           | 0         | 0         | 0        | 0        | 0        |

| Component          | FC         | JJY         | WYX       | YYB       | YCS      | YT       | QBL      |
|--------------------|------------|-------------|-----------|-----------|----------|----------|----------|
| 12-ketolithochol   | 96178.9194 | 115543.6675 | 0         | 0         | 0        | 0        | 0        |
| Allolithocholic ac | 2252.32424 | 13201.9411  | 0         | 108.14747 | 0        | 0        | 0        |
| Alpha-Muricholi    | 89501.0169 | 52627.31986 | 153819.09 | 213235.47 | 33804.45 | 0        | 663.0265 |
| Deoxycholic acid   | 1091438.71 | 476077.2702 | 44350.044 | 871.53288 | 0        | 0        | 3551.927 |
| Isolithocholic aci | 1412.2002  | 14202.11607 | 0         | 58.92063  | 0        | 0        | 0        |
| Taurodeoxycholi    | 352.941789 | 2634.298707 | 190.69417 | 0         | 0        | 0        | 292.1307 |
| lithocholic acid   | 1920430.41 | 1735222.134 | 3054.9481 | 5411.1614 | 1107.316 | 309.3004 | 0        |

**E**

| OTU ID           | FC         | JJY         | WYX       | YYB       | QBL      | YCS      | YT       |
|------------------|------------|-------------|-----------|-----------|----------|----------|----------|
| Actinobacteriota | 0.06456371 | 0.090548054 | 0.0204244 | 0.1719051 | 0.201634 | 0.033587 | 0.002269 |
| Bacteroidota     | 0.00896403 | 0.021332123 | 0.2444117 | 0.0224668 | 0.09259  | 0.000681 | 0.835697 |
| Cyanobacteria    | 0          | 0           | 0.003631  | 0         | 0        | 0.019744 | 0        |
| Firmicutes       | 0.86769545 | 0.855667764 | 0.4671508 | 0.7754454 | 0.685351 | 0.221037 | 0.120958 |
| Proteobacteria   | 0.05026665 | 0.032452059 | 0.2643822 | 0.0301827 | 0.018722 | 0.724952 | 0.041076 |
| Unclassified     | 0          | 0           | 0         | 0         | 0.001702 | 0        | 0        |
| Verrucomicrobic  | 0.00851016 | 0           | 0         | 0         | 0        | 0        | 0        |

**E**

| OTU ID          | FC         | JJY         | WYX       | YYB       | QBL      | YCS      | YT       |
|-----------------|------------|-------------|-----------|-----------|----------|----------|----------|
| Actinobacteria  | 0.04992625 | 0.089640304 | 0.0047657 | 0.1719051 | 0.200045 | 0.030296 | 0.002156 |
| Alphaproteobact | 0.01214116 | 0.004084875 | 0.0498128 | 0.0179281 | 0.006468 | 0.337796 | 0.016566 |
| Bacilli         | 0.02655169 | 0.005673437 | 0.0851016 | 0.733235  | 0.327811 | 0.216044 | 0.096221 |
| Bacteroidia     | 0.00896403 | 0.021332123 | 0.2444117 | 0.0224668 | 0.09259  | 0.000681 | 0.835697 |
| Clostridia      | 0.82366958 | 0.849994327 | 0.2787927 | 0.0415296 | 0.356065 | 0.004993 | 0.018722 |
| Coriobacteriia  | 0.014524   | 0.00090775  | 0.0154317 | 0         | 0.001589 | 0        | 0        |
| Cyanobacteriia  | 0          | 0           | 0.003631  | 0         | 0        | 0.019744 | 0        |
| Gammaproteoba   | 0.0381255  | 0.028367185 | 0.2145694 | 0.0122546 | 0.012255 | 0.387155 | 0.024509 |
| Negativicutes   | 0.01747419 | 0           | 0.1032566 | 0.0006808 | 0.001475 | 0        | 0.006014 |
| Rubrobacteria   | 0.00011347 | 0           | 0.0002269 | 0         | 0        | 0.003291 | 0.000113 |
| Unclassified    | 0          | 0           | 0         | 0         | 0.001702 | 0        | 0        |
| Verrucomicrobia | 0.00851016 | 0           | 0         | 0         | 0        | 0        | 0        |

| OTU ID       | FC | JJY | WYX | YYB | QBL      | YCS | YT |
|--------------|----|-----|-----|-----|----------|-----|----|
| Bacteria     | 1  | 1   | 1   | 1   | 0.998298 | 1   | 1  |
| Unclassified | 0  | 0   | 0   | 0   | 0.001702 | 0   | 0  |

| OTU ID              | FC         | JJY         | WYX       | YYB       | QBL      | YCS      | YT       |
|---------------------|------------|-------------|-----------|-----------|----------|----------|----------|
| Acidaminococca      | 0          | 0           | 0.0487916 | 0         | 0        | 0        | 0        |
| Akkermansiaceae     | 0.00851016 | 0           | 0         | 0         | 0        | 0        | 0        |
| Alicyclobacillaceae | 0          | 0           | 0         | 0         | 0        | 0.008851 | 0        |
| Atopobiaceae        | 0          | 0           | 0         | 0         | 0.000227 | 0        | 0        |
| Bacillaceae         | 0.00011347 | 0           | 0         | 0         | 0.000454 | 0.000681 | 0.000227 |
| Bacteroidaceae      | 0.00453875 | 0.020651311 | 0.2427096 | 0.0163395 | 0.082378 | 0.000681 | 0.816635 |
| Beijerinckiaceae    | 0.00022694 | 0.000226937 | 0         | 0.0026098 | 0.000681 | 0        | 0.001929 |
| Bifidobacteriaceae  | 0.0493589  | 0.088959492 | 0         | 0.1662317 | 0.198457 | 0.001816 | 0        |

|                           |            |             |           |           |          |          |          |
|---------------------------|------------|-------------|-----------|-----------|----------|----------|----------|
| Burkholderiaceae          | 0.0203109  | 0.001588562 | 0.059798  | 0.0029502 | 0.004766 | 0.382049 | 0.012255 |
| Butyricocccaceae          | 0          | 0           | 0         | 0         | 0.002269 | 0        | 0        |
| Carnobacteriaceae         | 0.00022694 | 0.000226937 | 0         | 0.0037445 | 0.000227 | 0        | 0.003177 |
| Caulobacteraceae          | 0.00102122 | 0           | 0.0049926 | 0.0001135 | 0.00034  | 0.062975 | 0        |
| Chitinophagaceae          | 0.00442528 | 0.000680812 | 0.001702  | 0.0061273 | 0.003971 | 0        | 0.019063 |
| Chloroplastnorar          | 0          | 0           | 0.003631  | 0         | 0        | 0.019744 | 0        |
| ClostridiaUCG01           | 0          | 0           | 0         | 0         | 0.000227 | 0        | 0        |
| Clostridiaceae            | 0          | 0           | 0         | 0.0182685 | 0        | 0        | 0        |
| Comamonadaceae            | 0.00011347 | 0           | 0         | 0         | 0        | 0.004766 | 0        |
| Coriobacteriaceae         | 0.014524   | 0           | 0         | 0         | 0        | 0        | 0        |
| Corynebacteriaceae        | 0          | 0           | 0         | 0         | 0.000113 | 0        | 0        |
| Eggerthellaceae           | 0          | 0.00090775  | 0.0154317 | 0         | 0.001362 | 0        | 0        |
| Enterobacteriaceae        | 0.00283672 | 0.025757404 | 0.1241348 | 0.0004539 | 0.000227 | 0        | 0.009531 |
| Enterococcaceae           | 0          | 0           | 0.0044253 | 0.0144105 | 0.006922 | 0        | 0        |
| Erysipelatoclostridiaceae | 0          | 0.001928969 | 0.010893  | 0.0014751 | 0.000567 | 0        | 0        |
| Erysipelotrichaceae       | 0          | 0           | 0.0021559 | 0         | 0.000454 | 0        | 0        |
| Eubacteriaceae            | 0          | 0           | 0         | 0         | 0.025417 | 0        | 0        |
| Hydrogenophilaceae        | 0          | 0           | 0         | 0         | 0        | 0.00034  | 0.002269 |
| Labraceae                 | 0          | 0           | 0         | 0.0002269 | 0.000227 | 0        | 0.000227 |
| Lachnospiraceae           | 0.22705095 | 0.781232271 | 0.2210371 | 0.0180415 | 0.167593 | 0.001362 | 0        |
| Lactobacillaceae          | 0          | 0           | 0.0057869 | 0.509815  | 0.312493 | 0        | 0.002156 |
| Microbacteriaceae         | 0.00011347 | 0.000680812 | 0.0040849 | 0.005333  | 0.000908 | 0        | 0.000681 |
| Micrococcaceae            | 0.00011347 | 0           | 0         | 0         | 0        | 0.026438 | 0        |
| Monoglobaceae             | 0.00295019 | 0           | 0         | 0         | 0        | 0        | 0        |
| Mycobacteriaceae          | 0.00011347 | 0           | 0         | 0.0003404 | 0.00034  | 0        | 0.001475 |
| Oscillospiraceae          | 0.00329059 | 0.000567344 | 0.0009078 | 0         | 0.155679 | 0        | 0        |
| Peptostreptococcaceae     | 0.02121865 | 0.010666062 | 0.0169068 | 0.0052196 | 0.000113 | 0        | 0.018722 |
| Propionibacteriaceae      | 0.00022694 | 0           | 0.0006808 | 0         | 0.000227 | 0.002042 | 0        |
| Pseudomonadaceae          | 0.00068081 | 0.000113469 | 0         | 0.0007943 | 0        | 0        | 0        |
| Reyranellaceae            | 0          | 0           | 0         | 0         | 0.000454 | 0        | 0        |
| Rhizobiaceae              | 0.00249631 | 0.00272325  | 0.005333  | 0.0114603 | 0.001248 | 0.000113 | 0.007716 |
| Rhodanobacteriaceae       | 0.00703506 | 0.000113469 | 0.0031771 | 0.0066947 | 0.003404 | 0        | 0.000454 |
| Rubrobacteriaceae         | 0.00011347 | 0           | 0.0002269 | 0         | 0        | 0.003291 | 0.000113 |
| Ruminococcaceae           | 0.56337229 | 0.057074776 | 0.0312039 | 0         | 0.004766 | 0.003631 | 0        |
| Sphingomonadaceae         | 0.00714853 | 0.000794281 | 0.0369908 | 0.0007943 | 0.001475 | 0.270056 | 0.001362 |
| Sporolactobacillaceae     | 0.01214116 | 0.001361625 | 0.021786  | 0.0011347 | 0.001816 | 0.205378 | 0.009872 |
| Staphylococcaceae         | 0          | 0           | 0         | 0         | 0.000227 | 0.000681 | 0        |
| Streptococcaceae          | 0.01407012 | 0.002155906 | 0.0400545 | 0.2026552 | 0.004652 | 0.000454 | 0.08079  |
| Sutterellaceae            | 0          | 0           | 0         | 0         | 0.00034  | 0        | 0        |
| Tannerellaceae            | 0          | 0           | 0         | 0         | 0.006241 | 0        | 0        |
| Unclassified              | 0          | 0           | 0         | 0         | 0.001702 | 0        | 0        |
| Veillonellaceae           | 0.01747419 | 0           | 0.054465  | 0.0006808 | 0.001475 | 0        | 0.006014 |
| Xanthobacteraceae         | 0.00124816 | 0.000340406 | 0.0024963 | 0.0027233 | 0.002042 | 0.004652 | 0.005333 |
| Xanthomonadaceae          | 0.00714853 | 0.000794281 | 0.0274594 | 0.0013616 | 0.003518 | 0        | 0        |
| [Eubacterium] cc          | 0.00578691 | 0.000453875 | 0.0087371 | 0         | 0        | 0        | 0        |

| OTU ID             | FC         | JJY         | WYX       | YYB       | QBL      | YCS      | YT       |
|--------------------|------------|-------------|-----------|-----------|----------|----------|----------|
| Aeriscardovia      |            | 0           | 0         | 0         | 0.178713 |          | 0        |
| Agathobacter       | 0.00204244 | 0.013162374 |           | 0         | 0        | 0        | 0        |
| Akkermansia        | 0.00851016 | 0           |           | 0         | 0        | 0        | 0        |
| Anaerostipes       | 0.00102122 | 0.154657892 | 0.008964  |           | 0        | 0.000454 | 0        |
| Asinibacterium     | 0.00045388 | 0           | 0.0002269 | 0.0001135 |          | 0        | 0.000113 |
| Bacillus           | 0.00011347 | 0           | 0         | 0         | 0.000454 | 0.000681 | 0.000227 |
| Bacteroides        | 0.00453875 | 0.020651311 | 0.2427096 | 0.0163395 | 0.082378 | 0.000681 | 0.816635 |
| Bifidobacteriaceae | 0          | 0           | 0         | 0         | 0.000227 | 0        | 0        |
| Bifidobacterium    | 0.0493589  | 0.088959492 |           | 0.1662317 | 0.019517 | 0.001816 | 0        |
| Blautia            | 0.07035062 | 0.187790764 | 0.1071145 |           | 0.055827 | 0        | 0        |
| Bradyrhizobium     | 0.00056734 | 0.000340406 | 0.0021559 | 0.0022694 | 0.001135 | 0.004539 | 0.004993 |

|                    |            |             |           |           |          |          |          |
|--------------------|------------|-------------|-----------|-----------|----------|----------|----------|
| BurkholderiaCab    | 0.00034041 | 0           | 0         | 0.0006808 | 0.000794 | 0        | 0        |
| Butyricoccus       | 0          | 0           | 0         | 0         | 0.002269 | 0        | 0        |
| Caulobacter        | 0.00090775 | 0           | 0.0049926 | 0.0001135 | 0.00034  | 0.032112 | 0        |
| Caulobacteracea    | 0.00011347 | 0           | 0         | 0         | 0        | 0.030863 | 0        |
| Chitinophaga       | 0.00079428 | 0           | 0.0009078 | 0.0020424 | 0.000567 | 0        | 0.003971 |
| Chloroplastnorar   | 0          | 0           | 0.003631  | 0         | 0        | 0.019744 | 0        |
| ClostridiaUCG01    | 0          | 0           | 0         | 0         | 0.000227 | 0        | 0        |
| Clostridiumsensu   | 0          | 0           | 0         | 0.0182685 | 0        | 0        | 0        |
| Collinsella        | 0.014524   | 0           | 0         | 0         | 0        | 0        | 0        |
| Comamonas          | 0.00011347 | 0           | 0         | 0         | 0        | 0        | 0        |
| Cutibacterium      | 0.00022694 | 0           | 0.0006808 | 0         | 0.000227 | 0.002042 | 0        |
| Delftia            | 0          | 0           | 0         | 0         | 0        | 0.004766 | 0        |
| Dialister          | 0.01747419 | 0           | 0.0120277 | 0.0002269 | 0        | 0        | 0        |
| Dorea              | 0.01214116 | 0.057074776 | 0         | 0         | 0        | 0        | 0        |
| Eggerthella        | 0          | 0.00090775  | 0.0154317 | 0         | 0.001362 | 0        | 0        |
| Enterobacter       | 0          | 0           | 0.0006808 | 0         | 0        | 0        | 0.002042 |
| Enterococcus       | 0          | 0           | 0.0044253 | 0.0144105 | 0.006922 | 0        | 0        |
| Erysipelatoclostri | 0          | 0           | 0         | 0         | 0.000227 | 0        | 0        |
| Erysipelatoclostri | 0          | 0.001928969 | 0.010893  | 0.0014751 | 0.00034  | 0        | 0        |
| EscherichiaShige   | 0.00283672 | 0.025757404 | 0.123454  | 0.0004539 | 0.000227 | 0        | 0.006354 |
| Eubacterium        | 0          | 0           | 0         | 0         | 0.025417 | 0        | 0        |
| Faecalibacterium   | 0.21411551 | 0.026665154 | 0.0293884 | 0         | 0        | 0.002837 | 0        |
| Flavonifractor     | 0          | 0.000567344 | 0.0009078 | 0         | 0.155679 | 0        | 0        |
| Fusicatenibacter   | 0.06966981 | 0.187904232 | 0         | 0         | 0        | 0        | 0        |
| Granulicatella     | 0.00022694 | 0.000226937 | 0         | 0.0037445 | 0.000227 | 0        | 0.003177 |
| Howardella         | 0          | 0           | 0         | 0.0080563 | 0        | 0        | 0        |
| Hungatella         | 0          | 0.001248156 | 0         | 0         | 0.003291 | 0.00034  | 0        |
| Hydrogenophilu     | 0          | 0           | 0         | 0         | 0        | 0.00034  | 0.002269 |
| IncertaeSedis      | 0          | 0.00090775  | 0.0009078 | 0         | 0.004766 | 0        | 0        |
| Intestinibacter    | 0.00317713 | 0.006127312 | 0.0007943 | 0.0032906 | 0        | 0        | 0        |
| Klebsiella         | 0          | 0           | 0         | 0         | 0        | 0        | 0        |
| Labrys             | 0          | 0           | 0         | 0.0002269 | 0.000227 | 0        | 0.000227 |
| Lachnoclostridiu   | 0.0018155  | 0.001134687 | 0.0062408 | 0.0047657 | 0.004425 | 0        | 0        |
| Lachnospira        | 0.00022694 | 0           | 0         | 0         | 0.000454 | 0        | 0        |
| Lachnospiraceae    | 0.00011347 | 0.000226937 | 0         | 0         | 0        | 0        | 0        |
| Lachnospiraceae    | 0          | 0.005446499 | 0.0263247 | 0         | 0.011687 | 0        | 0        |
| Lacticaseibacillus | 0          | 0           | 0         | 0.0012482 | 0        | 0        | 0        |
| Lactobacillus      | 0          | 0           | 0.0002269 | 0.0002269 | 0.183025 | 0        | 0.001816 |
| Lawsonella         | 0          | 0           | 0         | 0         | 0.000113 | 0        | 0        |
| Ligilactobacillus  | 0          | 0           | 0.0054465 | 0.4925678 | 0.117213 | 0        | 0.00034  |
| Limosilactobacill  | 0          | 0           | 0.0001135 | 0.0157722 | 0.00295  | 0        | 0        |
| Mesorhizobium      | 0.00079428 | 0.000567344 | 0.0023828 | 0.0041983 | 0.001021 | 0.000113 | 0.003291 |
| Methylovirgula     | 0.00022694 | 0.000226937 | 0         | 0.0026098 | 0.000681 | 0        | 0.001929 |
| Microbacterium     | 0.00011347 | 0.000680812 | 0.0040849 | 0.005333  | 0.000908 | 0        | 0.000681 |
| Monoglobus         | 0.00295019 | 0           | 0         | 0         | 0        | 0        | 0        |
| Mycobacterium      | 0.00011347 | 0           | 0         | 0.0003404 | 0.00034  | 0        | 0.001475 |
| Olsenella          | 0          | 0           | 0         | 0         | 0.000227 | 0        | 0        |
| Parabacteroides    | 0          | 0           | 0         | 0         | 0.006241 | 0        | 0        |
| Pediococcus        | 0          | 0           | 0         | 0         | 0.009304 | 0        | 0        |
| Peptostreptococ    | 0          | 0.000113469 | 0.0040849 | 0.0001135 | 0.000113 | 0        | 0.018722 |
| Phascolarctobac    | 0          | 0           | 0.0487916 | 0         | 0        | 0        | 0        |
| Phyllobacterium    | 0.00170203 | 0.002155906 | 0.0029502 | 0.007262  | 0.000227 | 0        | 0.004425 |
| Pseudarthrobact    | 0          | 0           | 0         | 0         | 0        | 0.014637 | 0        |
| Pseudolabrys       | 0          | 0           | 0         | 0         | 0.000227 | 0        | 0        |
| Pseudomonas        | 0.00068081 | 0.000113469 | 0         | 0.0007943 | 0        | 0        | 0        |
| Ralstonia          | 0.0199705  | 0.001588562 | 0.059798  | 0.0022694 | 0.003971 | 0.382049 | 0.012255 |
| Renibacterium      | 0.00011347 | 0           | 0         | 0         | 0        | 0.011801 | 0        |
| Reyranella         | 0          | 0           | 0         | 0         | 0.000454 | 0        | 0        |



|                         |            |             |           |           |          |          |          |
|-------------------------|------------|-------------|-----------|-----------|----------|----------|----------|
| Rhodanobacter           | 0.00703506 | 0.000113469 | 0.0031771 | 0.0066947 | 0.003404 | 0        | 0.000454 |
| Rhodopseudomonas        | 0.00056734 | 0           | 0         | 0         | 0.000227 | 0.000113 | 0.000227 |
| Romboutsia              | 0.01804153 | 0.004425281 | 0.0120277 | 0.0018155 | 0        | 0        | 0        |
| Roseburia               | 0.0417565  | 0           | 0         | 0         | 0        | 0.000227 | 0        |
| Rubrobacter             | 0.00011347 | 0           | 0.0002269 | 0         | 0        | 0.003291 | 0.000113 |
| Ruminococcus            | 0.0417565  | 0           | 0.0009078 | 0         | 0        | 0.000227 | 0        |
| Salmonella              | 0          | 0           | 0         | 0         | 0        | 0        | 0.001135 |
| Sellimonas              | 0          | 0           | 0         | 0         | 0.027346 | 0        | 0        |
| Sphingomonas            | 0.00714853 | 0.000794281 | 0.0369908 | 0.0007943 | 0.001475 | 0.270056 | 0.001362 |
| Sporolactobacillus      | 0.01214116 | 0.001361625 | 0.021786  | 0.0011347 | 0.001816 | 0.205378 | 0.009872 |
| Staphylococcus          | 0          | 0           | 0         | 0         | 0.000227 | 0.000681 | 0        |
| Stenotrophomonas        | 0.00714853 | 0.000794281 | 0.0274594 | 0.0013616 | 0.003518 | 0        | 0        |
| Streptococcus           | 0.01407012 | 0.002155906 | 0.0400545 | 0.2026552 | 0.004652 | 0.000454 | 0.08079  |
| Subdoligranulum         | 0.30750028 | 0.029501872 | 0         | 0         | 0        | 0.000567 | 0        |
| Sutterella              | 0          | 0           | 0         | 0         | 0.00034  | 0        | 0        |
| Tumebacillus            | 0          | 0           | 0         | 0         | 0        | 0.008851 | 0        |
| Tyzzarella              | 0          | 0.000680812 | 0         | 0         | 0.013276 | 0        | 0        |
| UCG002                  | 0.00329059 | 0           | 0         | 0         | 0        | 0        | 0        |
| Unclassified            | 0          | 0           | 0         | 0         | 0.001702 | 0        | 0        |
| Veillonella             | 0          | 0           | 0.0424373 | 0.0004539 | 0.001475 | 0        | 0.006014 |
| Vibrionimonas           | 0.00317713 | 0.000680812 | 0.0005673 | 0.0039714 | 0.003404 | 0        | 0.014978 |
| Xanthobacteraceae       | 0.00011347 | 0           | 0.0003404 | 0.0004539 | 0.000454 | 0        | 0.000113 |
| Clostridiuminnocentiae  | 0          | 0           | 0.0021559 | 0         | 0.000454 | 0        | 0        |
| Eubacteriumcoprothergum | 0.00578691 | 0.000453875 | 0.0087371 | 0         | 0        | 0        | 0        |
| Eubacteriumhallii       | 0.01940315 | 0.100306366 | 0         | 0         | 0.000227 | 0.00034  | 0        |
| Eubacteriumventriosum   | 0.00011347 | 0.006354249 | 0         | 0         | 0        | 0        | 0        |
| Ruminococcusgnavus      | 0.00045388 | 0.040394871 | 0.0723931 | 0.0052196 | 0.051061 | 0        | 0        |
| RuA143A180min           | 0.00794281 | 0.024849654 | 0         | 0         | 0        | 0        | 0        |

| OTU ID               | FC         | JJY         | WYX       | YYB       | QBL      | YCS      | YT       |
|----------------------|------------|-------------|-----------|-----------|----------|----------|----------|
| Acidaminococcales    | 0          | 0           | 0.0487916 | 0         | 0        | 0        | 0        |
| Alicyclobacillales   | 0          | 0           | 0         | 0         | 0        | 0.008851 | 0        |
| Bacillales           | 0.01225462 | 0.001361625 | 0.021786  | 0.0011347 | 0.002269 | 0.206059 | 0.010099 |
| Bacteroidales        | 0.00453875 | 0.020651311 | 0.2427096 | 0.0163395 | 0.088619 | 0.000681 | 0.816635 |
| Bifidobacteriales    | 0.0493589  | 0.088959492 | 0         | 0.1662317 | 0.198457 | 0.001816 | 0        |
| Burkholderiales      | 0.02042437 | 0.001588562 | 0.059798  | 0.0029502 | 0.005106 | 0.387155 | 0.014524 |
| Caulobacterales      | 0.00102122 | 0           | 0.0049926 | 0.0001135 | 0.00034  | 0.062975 | 0        |
| Chitinophagales      | 0.00442528 | 0.000680812 | 0.001702  | 0.0061273 | 0.003971 | 0        | 0.019063 |
| Chloroplast          | 0          | 0           | 0.003631  | 0         | 0        | 0.019744 | 0        |
| ClostridiaUCG01      | 0          | 0           | 0         | 0         | 0.000227 | 0        | 0        |
| Clostridiales        | 0          | 0           | 0         | 0.0182685 | 0        | 0        | 0        |
| Coriobacteriales     | 0.014524   | 0.00090775  | 0.0154317 | 0         | 0.001589 | 0        | 0        |
| Corynebacteriales    | 0.00011347 | 0           | 0         | 0.0003404 | 0.000454 | 0        | 0.001475 |
| Enterobacteriales    | 0.00283672 | 0.025757404 | 0.1241348 | 0.0004539 | 0.000227 | 0        | 0.009531 |
| Erysipelotrichales   | 0          | 0.001928969 | 0.0130489 | 0.0014751 | 0.001021 | 0        | 0        |
| Eubacteriales        | 0          | 0           | 0         | 0         | 0.025417 | 0        | 0        |
| Lachnospirales       | 0.22705095 | 0.781232271 | 0.2210371 | 0.0180415 | 0.167593 | 0.001362 | 0        |
| Lactobacillales      | 0.01429706 | 0.002382844 | 0.0502667 | 0.7306252 | 0.324294 | 0.000454 | 0.086123 |
| Micrococcales        | 0.00022694 | 0.000680812 | 0.0040849 | 0.005333  | 0.000908 | 0.026438 | 0.000681 |
| Monoglobales         | 0.00295019 | 0           | 0         | 0         | 0        | 0        | 0        |
| Oscillospirales      | 0.57244979 | 0.058095995 | 0.0408487 | 0         | 0.162714 | 0.003631 | 0        |
| Peptostreptococcales | 0.02121865 | 0.010666062 | 0.0169068 | 0.0052196 | 0.000113 | 0        | 0.018722 |
| Propionibacteriales  | 0.00022694 | 0           | 0.0006808 | 0         | 0.000227 | 0.002042 | 0        |
| Pseudomonadales      | 0.00068081 | 0.000113469 | 0         | 0.0007943 | 0        | 0        | 0        |
| Reyranelles          | 0          | 0           | 0         | 0         | 0.000454 | 0        | 0        |
| Rhizobiales          | 0.00397141 | 0.003290593 | 0.0078293 | 0.0170203 | 0.004198 | 0.004766 | 0.015205 |
| Rubrobacteriales     | 0.00011347 | 0           | 0.0002269 | 0         | 0        | 0.003291 | 0.000113 |
| Sphingomonadales     | 0.00714853 | 0.000794281 | 0.0369908 | 0.0007943 | 0.001475 | 0.270056 | 0.001362 |

|                    |            |            |           |           |          |          |          |
|--------------------|------------|------------|-----------|-----------|----------|----------|----------|
| Staphylococcales   | 0          | 0          | 0         | 0         | 0.000227 | 0.000681 | 0        |
| Unclassified       | 0          | 0          | 0         | 0         | 0.001702 | 0        | 0        |
| VeillonellalesSele | 0.01747419 | 0          | 0.054465  | 0.0006808 | 0.001475 | 0        | 0.006014 |
| Verrucomicrobia    | 0.00851016 | 0          | 0         | 0         | 0        | 0        | 0        |
| Xanthomonadales    | 0.01418359 | 0.00090775 | 0.0306366 | 0.0080563 | 0.006922 | 0        | 0.000454 |

| OTU ID             | fangchen   | jujingyi    | wuyexing  | yangyanbo | qianbinlin | youchang | syutao   |
|--------------------|------------|-------------|-----------|-----------|------------|----------|----------|
| Aeriscardovia_Ur   | 0          | 0           | 0         | 0         | 0.178713   | 0        | 0        |
| Agathobacter_Ur    | 0.00204244 | 0.013162374 | 0         | 0         | 0          | 0        | 0        |
| Akkermansia_mu     | 0.00851016 | 0           | 0         | 0         | 0          | 0        | 0        |
| Anaerostipes_car   | 0          | 0           | 0.008964  | 0         | 0          | 0        | 0        |
| Anaerostipes_ha    | 0.00102122 | 0.154317486 | 0         | 0         | 0          | 0.000454 | 0        |
| Anaerostipes_un    | 0          | 0.000340406 | 0         | 0         | 0          | 0        | 0        |
| Asinibacterium_t   | 0.00045388 | 0           | 0.0002269 | 0.0001135 | 0          | 0        | 0.000113 |
| Bacillus_uncultur  | 0.00011347 | 0           | 0         | 0         | 0.000454   | 0.000681 | 0.000227 |
| Bacteroidesdorei   | 0          | 0.000453875 | 0         | 0         | 0.005106   | 0        | 0        |
| Bacteroidesdorei   | 0          | 0           | 0         | 0         | 0.000567   | 0        | 0        |
| Bacteroidesfragil  | 0          | 0.001361625 | 0.0024963 | 0.0115738 | 0.001929   | 0        | 0.026665 |
| Bacteroidesfragil  | 0          | 0.015658686 | 0.165097  | 0.0047657 | 0.011233   | 0        | 0.789856 |
| Bacteroidesovatu   | 0.00022694 | 0.000340406 | 0         | 0         | 0.001362   | 0        | 0        |
| Bacteroidessalye   | 0          | 0           | 0         | 0         | 0.001589   | 0        | 0        |
| Bacteroidestheta   | 0          | 0           | 0.0004539 | 0         | 0.002837   | 0        | 0        |
| Bacteroidestheta   | 0          | 0.000113469 | 0.0436855 | 0         | 0.003177   | 0        | 0        |
| Bacteroidesunifo   | 0.00022694 | 0.001248156 | 0.0308635 | 0         | 0.017474   | 0.00034  | 0.000113 |
| Bacteroidesvulg    | 0.00147509 | 0.000567344 | 0         | 0         | 0.012028   | 0        | 0        |
| Bacteroidesvulg    | 0.00249631 | 0.000453875 | 0         | 0         | 0.019744   | 0.00034  | 0        |
| Bacteroides_Unc    | 0          | 0.000226937 | 0         | 0         | 0.000681   | 0        | 0        |
| Bacteroides_unc    | 0.00011347 | 0.000226937 | 0         | 0         | 0.003971   | 0        | 0        |
| Bacteroides_unc    | 0          | 0           | 0.0001135 | 0         | 0.000681   | 0        | 0        |
| Bifidobacteriace   | 0          | 0           | 0         | 0         | 0.000227   | 0        | 0        |
| Bifidobacteriuma   | 0.04379893 | 0           | 0         | 0         | 0          | 0        | 0        |
| Bifidobacteriuma   | 0          | 0           | 0         | 0.0001135 | 0.009077   | 0        | 0        |
| Bifidobacteriumk   | 0          | 0           | 0         | 0.0097583 | 0          | 0        | 0        |
| Bifidobacteriumk   | 0          | 0           | 0         | 0.0121412 | 0          | 0        | 0        |
| Bifidobacteriuml   | 0.00555997 | 0           | 0         | 0.0538977 | 0          | 0        | 0        |
| Bifidobacteriumq   | 0          | 0.088959492 | 0         | 0.0903211 | 0          | 0.001816 | 0        |
| Bifidobacteriumq   | 0          | 0           | 0         | 0         | 0.001702   | 0        | 0        |
| Bifidobacterium_   | 0          | 0           | 0         | 0         | 0.008737   | 0        | 0        |
| BlautiahanseniiD   | 0          | 0           | 0         | 0         | 0.000227   | 0        | 0        |
| Blautia_Unclassif  | 0.0018155  | 0.000567344 | 0         | 0         | 0.052876   | 0        | 0        |
| Blautia_unculture  | 0.05934415 | 0.111085896 | 0.1057529 | 0         | 0.002723   | 0        | 0        |
| Blautia_unculture  | 0.00590037 | 0.008396687 | 0.0013616 | 0         | 0          | 0        | 0        |
| Bradyrhizobium_    | 0.00056734 | 0.000340406 | 0.0021559 | 0.0022694 | 0.001135   | 0.004539 | 0.004993 |
| Butyricococcus_U   | 0          | 0           | 0         | 0         | 0.002269   | 0        | 0        |
| Caulobactersp      | 0.00090775 | 0           | 0.0038579 | 0.0001135 | 0.000113   | 0.026438 | 0        |
| Caulobactervibri   | 0          | 0           | 0.0011347 | 0         | 0.000227   | 0.005673 | 0        |
| Caulobacteracea    | 0.00011347 | 0           | 0         | 0         | 0          | 0.030863 | 0        |
| Chitinophaga_Ur    | 0.00079428 | 0           | 0.0009078 | 0.0020424 | 0.000567   | 0        | 0.003971 |
| Citrusinensisswe   | 0          | 0           | 0.003631  | 0         | 0          | 0.019744 | 0        |
| Clostridiumsensu   | 0          | 0           | 0         | 0.0182685 | 0          | 0        | 0        |
| Collinsellaerofo   | 0.014524   | 0           | 0         | 0         | 0          | 0        | 0        |
| Comamonasaqu       | 0.00011347 | 0           | 0         | 0         | 0          | 0        | 0        |
| Cutibacteriumac    | 0.00022694 | 0           | 0.0006808 | 0         | 0.000227   | 0.002042 | 0        |
| Delftiaacidovor    | 0          | 0           | 0         | 0         | 0          | 0.004766 | 0        |
| DialisterinvisusD! | 0          | 0           | 0.0062408 | 0         | 0          | 0        | 0        |
| Dialisterpneumo    | 0          | 0           | 0.0057869 | 0.0002269 | 0          | 0        | 0        |
| DialisterspMarse   | 0.01747419 | 0           | 0         | 0         | 0          | 0        | 0        |
| Doreaformicigen    | 0.00397141 | 0.017587655 | 0         | 0         | 0          | 0        | 0        |

|                    |            |             |           |           |          |          |          |
|--------------------|------------|-------------|-----------|-----------|----------|----------|----------|
| Dorea_unculture    | 0.00816975 | 0.039487121 | 0         | 0         | 0        | 0        | 0        |
| Eggerthella_Uncl   | 0          | 0.00090775  | 0.0154317 | 0         | 0.001362 | 0        | 0        |
| Enterococcusavi    | 0          | 0           | 0.0031771 | 0.0095314 | 0.003291 | 0        | 0        |
| Enterococcusavi    | 0          | 0           | 0.0006808 | 0.0032906 | 0.002496 | 0        | 0        |
| Enterococcusfae    | 0          | 0           | 0         | 0.0009078 | 0.000454 | 0        | 0        |
| Enterococcusraff   | 0          | 0           | 0.0005673 | 0.0006808 | 0.000681 | 0        | 0        |
| Erysipelatoclostri | 0          | 0           | 0         | 0         | 0.000227 | 0        | 0        |
| Erysipelatoclostri | 0          | 0.001928969 | 0.010893  | 0.0014751 | 0.00034  | 0        | 0        |
| Erysipelotrichace  | 0          | 0           | 0.0021559 | 0         | 0.000454 | 0        | 0        |
| Escherichiacoli    | 0.00011347 | 0.001248156 | 0.0002269 | 0         | 0.000227 | 0        | 0.000113 |
| Escherichiamarr    | 0.00272325 | 0.02428231  | 0.1232271 | 0.0004539 | 0        | 0        | 0.006241 |
| EscherichiaShige   | 0          | 0.000226937 | 0         | 0         | 0        | 0        | 0        |
| Eubacteriumcalla   | 0          | 0           | 0         | 0         | 0.02519  | 0        | 0        |
| Eubacterium_Un     | 0          | 0           | 0         | 0         | 0.000227 | 0        | 0        |
| Faecalibacterium   | 0.10734143 | 0.006467718 | 0.008964  | 0         | 0        | 0        | 0        |
| Faecalibacterium   | 0.08033587 | 0.020083967 | 0.0204244 | 0         | 0        | 0.002156 | 0        |
| Faecalibacterium   | 0.02643822 | 0.000113469 | 0         | 0         | 0        | 0.000681 | 0        |
| Flavonifractorpla  | 0          | 0.000453875 | 0.0009078 | 0         | 0.148417 | 0        | 0        |
| Flavonifractor_Ui  | 0          | 0.000113469 | 0         | 0         | 0.005333 | 0        | 0        |
| Flavonifractor_ur  | 0          | 0           | 0         | 0         | 0.001929 | 0        | 0        |
| Fusicatenibacter_  | 0.06286168 | 0.174741859 | 0         | 0         | 0        | 0        | 0        |
| Fusicatenibacter_  | 0.00680812 | 0.013162374 | 0         | 0         | 0        | 0        | 0        |
| Granulicatella_ur  | 0.00022694 | 0.000226937 | 0         | 0.0037445 | 0.000227 | 0        | 0.003177 |
| Howardella_Uncl    | 0          | 0           | 0         | 0.0080563 | 0        | 0        | 0        |
| Hungatella_Uncl    | 0          | 0.001248156 | 0         | 0         | 0.003291 | 0.00034  | 0        |
| Hydrogenophilu     | 0          | 0           | 0         | 0         | 0        | 0.00034  | 0.002269 |
| IncertaeSedis_un   | 0          | 0           | 0         | 0         | 0.001021 | 0        | 0        |
| IncertaeSedis_un   | 0          | 0.00090775  | 0.0009078 | 0         | 0.003744 | 0        | 0        |
| Intestinibacterba  | 0.00317713 | 0.006127312 | 0.0007943 | 0.0032906 | 0        | 0        | 0        |
| Klebsiellaeroget   | 0          | 0           | 0.0006808 | 0         | 0        | 0        | 0.002042 |
| Klebsiella_Unclas  | 0          | 0           | 0         | 0         | 0        | 0        | 0        |
| Labrys_Unclassifi  | 0          | 0           | 0         | 0.0002269 | 0.000227 | 0        | 0.000227 |
| Lachnoclostridiu   | 0          | 0           | 0         | 0         | 0.027346 | 0        | 0        |
| Lachnoclostridiu   | 0.0018155  | 0           | 0         | 0         | 0        | 0        | 0        |
| Lachnoclostridiu   | 0          | 0           | 0         | 0         | 0.000227 | 0        | 0        |
| Lachnospira_Unc    | 0.00022694 | 0           | 0         | 0         | 0.000227 | 0        | 0        |
| Lachnospira_unc    | 0          | 0           | 0         | 0         | 0.000227 | 0        | 0        |
| Lachnospiraceae    | 0          | 0           | 0         | 0         | 0        | 0        | 0        |
| Lachnospiraceae    | 0.00011347 | 0.000226937 | 0         | 0         | 0        | 0        | 0        |
| Lachnospiraceae    | 0          | 0.005446499 | 0.0263247 | 0         | 0        | 0        | 0        |
| Lachnospiraceae    | 0          | 0           | 0         | 0         | 0.011687 | 0        | 0        |
| Lactobacilluscase  | 0          | 0           | 0         | 0.0012482 | 0        | 0        | 0        |
| Lactobacilluscrisj | 0          | 0           | 0         | 0         | 0.006354 | 0        | 0        |
| Lactobacilluscrisj | 0          | 0           | 0         | 0         | 0.047203 | 0        | 0.000227 |
| Lactobacillusfern  | 0          | 0           | 0.0001135 | 0.0157722 | 0        | 0        | 0        |
| Lactobacillusgall  | 0          | 0           | 0         | 0         | 0.033473 | 0        | 0        |
| Lactobacillusshel  | 0          | 0           | 0         | 0         | 0.002042 | 0        | 0        |
| Lactobacillusjohr  | 0          | 0           | 0         | 0         | 0.007489 | 0        | 0.000227 |
| Lactobacillusjohr  | 0          | 0           | 0         | 0         | 0.001475 | 0        | 0        |
| Lactobacillusjohr  | 0          | 0           | 0         | 0         | 0.000227 | 0        | 0        |
| Lactobacillusproj  | 0          | 0           | 0.0001135 | 0         | 0.035629 | 0        | 0.000681 |
| Lactobacillusreut  | 0          | 0           | 0         | 0         | 0.002042 | 0        | 0        |
| Lactobacillusaliv  | 0          | 0           | 0.0054465 | 0.4870078 | 0.110745 | 0        | 0.00034  |
| Lactobacillusaliv  | 0          | 0           | 0         | 0         | 0.000227 | 0        | 0        |
| Lactobacillus_Un   | 0          | 0           | 0.0001135 | 0.0002269 | 0.043005 | 0        | 0.000681 |
| Lactobacillus_un   | 0          | 0           | 0         | 0         | 0.000794 | 0        | 0        |
| Lactobacillus_un   | 0          | 0           | 0         | 0         | 0.005333 | 0        | 0        |
| Lawsonellaclevel   | 0          | 0           | 0         | 0         | 0.000113 | 0        | 0        |

|                    |            |             |           |           |          |          |          |
|--------------------|------------|-------------|-----------|-----------|----------|----------|----------|
| Ligilactobacillus_ | 0          | 0           | 0         | 0.00556   | 0.006241 | 0        | 0        |
| Limosilactobacill  | 0          | 0           | 0         | 0         | 0.000908 | 0        | 0        |
| Mesorhizobium_     | 0.00079428 | 0.000567344 | 0.0023828 | 0.0041983 | 0.001021 | 0.000113 | 0.003291 |
| Methylovirgula_L   | 0.00022694 | 0.000226937 | 0         | 0.0026098 | 0.000681 | 0        | 0.001929 |
| MicrobacteriumL    | 0          | 0           | 0         | 0.0001135 | 0.000454 | 0        | 0.000113 |
| Microbacterium_    | 0.00011347 | 0.000680812 | 0.0040849 | 0.0052196 | 0.000454 | 0        | 0.000567 |
| Monoglobuspec      | 0.00295019 | 0           | 0         | 0         | 0        | 0        | 0        |
| Mycobacteriumr     | 0.00011347 | 0           | 0         | 0.0003404 | 0.00034  | 0        | 0.001475 |
| Olsenellasporalt   | 0          | 0           | 0         | 0         | 0.000227 | 0        | 0        |
| Parabacteroides    | 0          | 0           | 0         | 0         | 0.004312 | 0        | 0        |
| Parabacteroides    | 0          | 0           | 0         | 0         | 0.001929 | 0        | 0        |
| Paraburkholderia   | 0.00034041 | 0           | 0         | 0.0006808 | 0.000794 | 0        | 0        |
| Pediococcusacid    | 0          | 0           | 0         | 0         | 0.009304 | 0        | 0        |
| Peptostreptococ    | 0          | 0.000113469 | 0.0040849 | 0.0001135 | 0.000113 | 0        | 0.018722 |
| Phascolarctobac    | 0          | 0           | 0.0487916 | 0         | 0        | 0        | 0        |
| Phyllobacterium    | 0.00170203 | 0.002155906 | 0.0029502 | 0.007262  | 0.000227 | 0        | 0.004425 |
| Pseudarthrobact    | 0          | 0           | 0         | 0         | 0        | 0.014637 | 0        |
| Pseudolabrys_Ur    | 0          | 0           | 0         | 0         | 0.000227 | 0        | 0        |
| Pseudomonaspu      | 0.00068081 | 0.000113469 | 0         | 0.0007943 | 0        | 0        | 0        |
| Ralstoniainsidios  | 0          | 0.000113469 | 0.0003404 | 0.0002269 | 0        | 0.008397 | 0.000567 |
| Ralstoniapickettii | 0.01985703 | 0.001475094 | 0.0587768 | 0.0020424 | 0.003858 | 0.366844 | 0.011233 |
| Ralstoniapickettii | 0.00011347 | 0           | 0.0006808 | 0         | 0.000113 | 0.005673 | 0.00034  |
| Ralstonia_uncult   | 0          | 0           | 0         | 0         | 0        | 0.001135 | 0.000113 |
| Renibacteriumsa    | 0.00011347 | 0           | 0         | 0         | 0        | 0.011801 | 0        |
| Reyranela_Uncla    | 0          | 0           | 0         | 0         | 0.000454 | 0        | 0        |
| Rhodanobacter_     | 0.00703506 | 0.000113469 | 0.0031771 | 0.0066947 | 0.003404 | 0        | 0.000454 |
| Rhodopseudom       | 0.00056734 | 0           | 0         | 0         | 0.000227 | 0.000113 | 0.000227 |
| Romboutsia_unc     | 0.01804153 | 0.004425281 | 0.0120277 | 0.0018155 | 0        | 0        | 0        |
| Roseburia_uncul    | 0.0417565  | 0           | 0         | 0         | 0        | 0.000227 | 0        |
| Rubroacter_Uni     | 0.00011347 | 0           | 0.0002269 | 0         | 0        | 0.003291 | 0.000113 |
| Ruminococcusfa     | 0.00794281 | 0           | 0         | 0         | 0        | 0        | 0        |
| Ruminococcus_L     | 0.00692159 | 0           | 0.0002269 | 0         | 0        | 0.000113 | 0        |
| Ruminococcus_u     | 0.0348349  | 0           | 0.0006808 | 0         | 0        | 0.000113 | 0        |
| Salmonellaenteri   | 0          | 0           | 0         | 0         | 0        | 0        | 0.001135 |
| Sphingomonasle     | 0.00714853 | 0.000794281 | 0.0366504 | 0.0007943 | 0.001248 | 0.24827  | 0        |
| Sphingomonass      | 0          | 0           | 0.0003404 | 0         | 0        | 0.021786 | 0.001362 |
| Sphingomonas_L     | 0          | 0           | 0         | 0         | 0.000227 | 0        | 0        |
| Sporolactobacill   | 0.01214116 | 0.001361625 | 0.021786  | 0.0011347 | 0.001816 | 0.205378 | 0.009872 |
| Staphylococcus     | 0          | 0           | 0         | 0         | 0.000227 | 0.000681 | 0        |
| Stenotrophomor     | 0.00714853 | 0.000794281 | 0.0274594 | 0.0013616 | 0.003518 | 0        | 0        |
| Streptococcusga    | 0          | 0           | 0         | 0.1700896 | 0        | 0        | 0        |
| Streptococcusgc    | 0          | 0           | 0.0001135 | 0.0002269 | 0        | 0        | 0.013276 |
| Streptococcusor    | 0          | 0           | 0.0014751 | 0.0015886 | 0        | 0        | 0.006922 |
| Streptococcuspa    | 0.00034041 | 0.000453875 | 0.0007943 | 0.0034041 | 0.000454 | 0.000113 | 0.028708 |
| Streptococcussal   | 0.01304891 | 0.001475094 | 0.0344945 | 0.0056734 | 0.001589 | 0.00034  | 0.005787 |
| Streptococcussp    | 0          | 0           | 0         | 0.0026098 | 0        | 0        | 0        |
| Streptococcus_U    | 0.00068081 | 0.000226937 | 0.0031771 | 0.0190627 | 0.00261  | 0        | 0.026098 |
| Subdoligranulun    | 0.30750028 | 0.02428231  | 0         | 0         | 0        | 0.000567 | 0        |
| Subdoligranulun    | 0          | 0.005219562 | 0         | 0         | 0        | 0        | 0        |
| Sutterella_uncult  | 0          | 0           | 0         | 0         | 0.00034  | 0        | 0        |
| Tumebacillus_un    | 0          | 0           | 0         | 0         | 0        | 0.008851 | 0        |
| Tyzzarella_Uncla   | 0          | 0           | 0         | 0         | 0.000681 | 0        | 0        |
| Tyzzarella_uncul   | 0          | 0           | 0         | 0         | 0.000227 | 0        | 0        |
| Tyzzarella_uncul   | 0          | 0.000680812 | 0         | 0         | 0.012368 | 0        | 0        |
| UCG002_Unclass     | 0.00329059 | 0           | 0         | 0         | 0        | 0        | 0        |
| Unclassified       | 0          | 0           | 0         | 0         | 0.001702 | 0        | 0        |
| Veillonellaparvul  | 0          | 0           | 0.0424373 | 0.0004539 | 0.001248 | 0        | 0.006014 |
| Veillonella_uncul  | 0          | 0           | 0         | 0         | 0.000227 | 0        | 0        |

|                  |            |             |           |           |          |         |          |
|------------------|------------|-------------|-----------|-----------|----------|---------|----------|
| Vibrionimonas_L  | 0.00317713 | 0.000680812 | 0.0005673 | 0.0039714 | 0.003404 | 0       | 0.014978 |
| Xanthobacterace  | 0.00011347 | 0           | 0.0003404 | 0.0004539 | 0.000454 | 0       | 0.000113 |
| Clostridiumbolte | 0          | 0.001134687 | 0.0009078 | 0.0047657 | 0.004198 | 0       | 0        |
| Clostridiumscind | 0          | 0           | 0.005333  | 0         | 0        | 0       | 0        |
| Eubacteriumcopi  | 0          | 0.000453875 | 0.0087371 | 0         | 0        | 0       | 0        |
| Eubacteriumcopi  | 0.00578691 | 0           | 0         | 0         | 0        | 0       | 0        |
| Eubacteriumhalli | 0          | 0.000340406 | 0         | 0         | 0.000227 | 0       | 0        |
| Eubacteriumhalli | 0.01940315 | 0.099965959 | 0         | 0         | 0        | 0.00034 | 0        |
| Eubacteriumvent  | 0.00011347 | 0.006354249 | 0         | 0         | 0        | 0       | 0        |
| Ruminococcusgr   | 0          | 0.002155906 | 0.0032906 | 0.0006808 | 0.002156 | 0       | 0        |
| Ruminococcusgr   | 0.00034041 | 0.019403154 | 0.0487916 | 0.0027233 | 0.030296 | 0       | 0        |
| Ruminococcusgr   | 0          | 0.000453875 | 0.0196301 | 0         | 0.014978 | 0       | 0        |
| Ruminococcusgr   | 0.00011347 | 0.018381936 | 0.0006808 | 0.0018155 | 0.003631 | 0       | 0        |
| Ruminococcusto   | 0          | 0.024849654 | 0         | 0         | 0        | 0       | 0        |
| humangutmetag    | 0.00329059 | 0.067740837 | 0         | 0         | 0        | 0       | 0        |
| unidentified     | 0          | 0           | 0         | 0         | 0.000227 | 0       | 0        |

**Figure3  
B**

| Day | Water+Water |             |            | Water+DCA |          |          |
|-----|-------------|-------------|------------|-----------|----------|----------|
|     | 100         | 100         | 100        | 100       | 100      | 100      |
| 0   |             |             |            |           |          |          |
| 1   | 101.6304348 | 102.8409091 | 106.547619 | 107.2626  | 107.9096 | 98.31461 |
| 2   | 102.173913  | 102.8409091 | 107.142857 | 108.3799  | 109.0395 | 97.75281 |
| 3   | 99.45652174 | 100.5681818 | 104.761905 | 103.9106  | 105.0847 | 98.31461 |
| 4   | 101.6304348 | 102.2727273 | 103.571429 | 102.7933  | 103.3898 | 99.4382  |
| 5   | 100         | 100         | 101.785714 | 101.676   | 105.0847 | 98.31461 |
| 6   | 97.82608696 | 100.5681818 | 103.571429 | 104.4693  | 106.7797 | 100.5618 |
| 7   | 98.91304348 | 101.7045455 | 109.52381  | 100.5587  | 101.1299 | 95.50562 |
| 8   | 101.0869565 | 104.5454545 | 111.309524 | 101.676   | 103.9548 | 97.19101 |
| 9   | 100.5555556 | 98.8700565  | 104.597701 | 97.3262   | 94.17989 | 96.64804 |
| 10  | 101.6304348 | 101.7045455 | 110.714286 | 106.1453  | 105.0847 | 101.1236 |
| 11  | 105.4347826 | 107.3863636 | 117.261905 | 111.7318  | 110.7345 | 105.618  |

**D**

| Water+Water | Water+DCA | DSS+Water | DSS+DCA |
|-------------|-----------|-----------|---------|
| 7.9         | 8.8       | 6.7       | 6.3     |
| 7.6         | 7.5       | 5.8       | 7       |
| 7.8         | 7.3       | 7         | 6.4     |
|             | 7.7       | 6.3       | 5.3     |
|             |           | 6.4       | 6.6     |
|             |           | 6.3       |         |
|             |           | 6.3       |         |

**F**

| Water+Water | Water+DCA | DSS+Water | DSS+DCA |
|-------------|-----------|-----------|---------|
| 0           | 0         | 2         | 6       |
| 0           | 1         | 4         | 5       |
| 0           |           | 1         | 6       |
|             |           | 3         | 4       |

**Figure4**

|             | Water+Water | Water+DCA | DSS+Water | DSS+DCA  |
|-------------|-------------|-----------|-----------|----------|
| IL1 $\beta$ | 0.987714    | 0.125381  | 0.029135  | 3.182054 |
|             | 1           | 0.12084   | 0.017821  | 8.29785  |
|             | 0.143631    | 0.199808  | 0.239552  | 2.121491 |
|             |             | 0.044475  | 0.876812  |          |
| IL6         | 0.03975     | 2.690189  | 51.07163  | 54.90215 |
|             | 1           | 5.118585  | 28.43883  | 15.7077  |
|             | 0.305514    | 0.023373  | 28.73124  | 5.897559 |
|             |             | 0.259215  | 34.94834  |          |
|             |             |           | 0.618109  |          |

|              |          |          |           |          |
|--------------|----------|----------|-----------|----------|
|              |          |          | 4.842409  |          |
|              |          |          | 4.985135  |          |
| IL8          | 0.639935 | 1.334741 | 31.92315  | 57.4285  |
|              | 1        | 0.619074 | 60.23316  | 7.537789 |
|              | 0.019851 | 0.188087 | 15.00136  | 26.12629 |
|              |          | 2.37669  | 181.6427* | 10.34778 |
|              |          |          | 0.277206  | 0.169583 |
|              |          |          | 0.416618  |          |
|              |          |          | 0.129736  |          |
| TNF          | 1.040749 | 1.371892 | 19.93777  | 49.33713 |
|              | 1        | 0.927889 | 30.97444  | 5.494241 |
|              | 0.007642 | 0.665956 | 13.12375  | 4.202283 |
|              |          | 1.089062 | 134.5094* | 5.400191 |
|              |          |          | 0.397915  | 0.046028 |
|              |          |          | 0.059029  |          |
|              |          |          | 0.03095   |          |
| IL4          | 1        | 0.811263 | 21.30315  | 22.66882 |
|              | 1        | 21.46759 | 32.50246  | 23.74419 |
|              | 1        | 0.121717 | 14.58514  | 36.24243 |
|              |          | 1.099767 | 40.38236  | 0.820548 |
|              |          |          | 0.056135  | 15.91162 |
|              |          |          | 43.10091  |          |
|              |          |          | 7.932382  |          |
| IL10         | 1        | 0.92785  | 20.19917  | 9.065883 |
|              | 1        | 19.76588 | 546.6585* | 19.60607 |
|              | 1        | 0.128278 | 16.85315  | 19.90528 |
|              |          | 0.822447 | 11.75159  | 5.424305 |
|              |          |          | 0.041445  | 17.50061 |
|              |          |          | 63.11639  |          |
|              |          |          | 4.49614   |          |
| IL17a        | 1        | 0.057996 | 2.299261  | 4.5202   |
|              | 1        | 1.37375  | 4.077147  | 12.20593 |
|              | 1        | 0.025811 | 1.562579  | 10.69316 |
|              |          | 0.085741 | 22.57373  | 0.089889 |
|              |          |          | 0.000531  | 2.194923 |
|              |          |          | 4.167585  |          |
|              |          |          | 0.699263  |          |
| IFN $\gamma$ | 1        | 0.01745  | 1.55112   | 0.301325 |
|              | 1        | 0.00671  | 0.002967  | 0.074423 |
|              | 1        | 0.011964 |           |          |

| Figure5<br>A | Water+Water | Water+DCA | DSS+Water | DSS+DCA |
|--------------|-------------|-----------|-----------|---------|
| CD8          | 1.37        | 2.93      | 2.07      | 3.99    |
|              | 2.61        | 1.88      | 2.77      | 2.38    |
|              | 2.95        | 1.96      | 3.5       | 3.96    |
|              |             |           |           | 4.88    |
| DC           | 0.89        | 1.35      | 2.26      | 1.62    |
|              | 1.09        | 0         | 1.66      | 0.93    |
|              | 1           | 0.66      | 1.29      | 1.44    |
|              |             |           |           | 1.4     |
| B220         | 27.5        | 44.3      | 14.3      | 36.8    |
|              | 30.4        | 28.4      | 28.6      | 28.8    |
|              | 49.2        | 47.5      | 44.9      | 39.1    |
|              |             |           |           | 34.7    |
| NEUTROPHIL   | 1           | 0.46      | 2.84      | 3.47    |
|              | 1.46        | 0.76      | 1.56      | 4.77    |
|              | 0.44        |           | 2.01      | 5.64    |
|              |             |           |           | 2.11    |

|             |      |      |      |       |
|-------------|------|------|------|-------|
| MONOCYTE    | 1.31 | 0.41 | 3.32 | 3.59  |
|             | 0.67 | 0.65 | 3.18 | 4.3   |
|             | 0.83 |      |      | 3.4   |
|             |      |      |      | 3.32  |
| MACROPAPHAG | 2.71 | 1.36 | 6.58 | 7.46  |
|             | 2.99 | 2.12 | 8.18 | 7.35  |
|             | 1.59 |      |      | 8.37  |
|             |      |      |      | 6.02  |
| CD3         | 8.11 | 15.5 | 11.3 | 21    |
|             | 14.2 | 8.84 | 10.9 | 17.1  |
|             | 13.3 | 8.86 | 15.5 | 19.9  |
|             |      |      |      | 21.8  |
| CD4         | 5.75 | 4.73 | 5.42 | 12.62 |
|             | 8.65 | 4.6  | 5.7  | 9.76  |
|             | 8.75 | 5.04 | 5.69 | 11.7  |
|             |      |      |      | 11.18 |

### Figure6

#### A

| OTU ID          | DD1        | DD2         | DD3       | DD5       | DD6      | DW1      | DW2      |
|-----------------|------------|-------------|-----------|-----------|----------|----------|----------|
| Acidobacteria   | 0          | 0.000266205 | 0         | 0         | 0        | 0        | 0        |
| Actinobacteria  | 0.00758685 | 0.006255823 | 0.0069213 | 0.006522  | 0.007188 | 0.005191 | 0.005457 |
| Bacteroidetes   | 0.08944496 | 0.112072408 | 0.0633568 | 0.0937042 | 0.136696 | 0.179822 | 0.246639 |
| Deferribacteres | 0.00039931 | 0.021030214 | 0         | 0.0262212 | 0.00173  | 0        | 0        |
| Deinococcus-Th  | 0.00066551 | 0.000133103 | 0         | 0.0001331 | 0.000799 | 0        | 0.000133 |
| Firmicutes      | 0.79102888 | 0.736323706 | 0.5996273 | 0.782111  | 0.620258 | 0.761081 | 0.709703 |
| Proteobacteria  | 0.10980966 | 0.121788899 | 0.3298283 | 0.0901105 | 0.232663 | 0.053507 | 0.037801 |
| Rhodophyta      | 0          | 0           | 0         | 0.0001331 | 0        | 0        | 0        |
| Unclassified    | 0.00106482 | 0.002129642 | 0.0002662 | 0.0010648 | 0.000666 | 0.000399 | 0.000266 |
| Verrucomicrobia | 0          | 0           | 0         | 0         | 0        | 0        | 0        |

#### D

| Tuft cell | Water+Water | Water+DCA | DSS+Water | DSS+DCA |
|-----------|-------------|-----------|-----------|---------|
|           | 10.5        | 5         | 3.335     | 3       |
|           | 5           | 7.5       | 2.665     | 2.335   |
|           |             |           | 11        | 5.5     |
|           |             |           | 9.5       | 8       |
|           |             |           | 14.5      |         |
|           |             |           | 9         |         |
|           |             |           | 13        |         |

### Supplementary Figure1

| Group | IL-1  | IL-6   | IL-8    | IL-2 | IL-4  | IL-5 | IL-17 |
|-------|-------|--------|---------|------|-------|------|-------|
| A-CD  | 1.37  | 177    | 142     | 0.05 | 1.26  | 0.18 | 7.28  |
| A-CD  | 3.46  | 17.12  | 77.26   | 1.52 | 1.96  | 1.54 | 14.41 |
| A-CD  | 2.39  | 5.34   | 225     | 0.51 | 1.08  | 0.72 | 9.36  |
| A-CD  | 2.07  | 21.55  | 32.48   | 0.75 | 1.63  | 0.71 | 13.4  |
| A-CD  | 5.4   | 5.07   | 148     | 2.72 | 0.53  | 0.74 | 4     |
| A-CD  | 2.44  | 56.69  | 90.77   | 0.92 | 1.41  | 0.88 | 6.37  |
| A-CD  | 3.24  | 10.76  | 230.4   | 2.2  | 6.5   | 1.51 | 28.57 |
| A-CD  | 5.38  | 18.58  | 86.72   | 1.75 | 5.55  | 1.83 | 27.99 |
| A-CD  | 4.44  | 37.72  | 155.1   | 1.77 | 1.42  | 1.17 | 37.46 |
| A-CD  | 1.77  | 7.35   | 20.18   | 0.54 | 12.57 | 0.67 | 8.78  |
| A-CD  | 30.14 | 152.04 | 806     | 1.18 | 0.59  | 0.98 | 13.22 |
| A-CD  | 2.25  | 8.7    | 1.14    | 0.76 | 0.01  | 0.89 | 6.78  |
| A-CD  | 10.14 | 460.24 | 2319.08 | 1.06 | 0.45  | 0.91 | 3.99  |
| A-CD  | 4.97  | 23.62  | 35.59   | 3.77 | 6.65  | 1.89 | 22.7  |
| A-CD  | 5.54  | 27.44  | 534     | 0.98 | 2.57  | 0.95 | 16.9  |
| A-CD  | 7.02  | 167.47 | 635.72  | 0.68 | 4.47  | 1.23 | 14.08 |
| A-CD  | 1.38  | 4.1    | 16.67   | 0.92 | 10.76 | 1.57 | 21.78 |
| A-CD  | 5.82  | 8.48   | 513     | 2.1  | 5.47  | 1    | 10.86 |

|       |       |        |         |       |       |       |           |
|-------|-------|--------|---------|-------|-------|-------|-----------|
| A-CD  | 1.1   | 21.85  | 77.4    | 0.89  | 3.02  | 0.1   | 11.96     |
| A-CD  | 2.92  | 240.3  | 74.5    | 1.86  | 3.34  | 1.19  | 48.32     |
| A-CD  | 30.62 | 170    | 667.91  | 1.32  | 1.17  | 0.65  | 2.56      |
| A-CD  | 3.88  | 11.14  | 33.49   | 1.19  | 1.96  | 1.56  | 13.75     |
| A-CD  | 11.14 | 17.68  | 167.4   | 3.8   | 3.85  | 1.01  | 22.95     |
| A-CD  | 0.56  | 6.04   | 21.95   | 0.39  | 0.78  | 0.01  | 14.34     |
| A-CD  | 3.79  | 10.67  | 175.18  | 1.7   | 1.28  | 1.47  | 42.61     |
| A-CD  | 2.96  | 20.68  | 167.2   | 1.42  | 2.65  | 1.47  | 22.36     |
| A-CD  | 2.17  | 1.73   | 14.35   | 0.01  | 0.35  | 0.01  | 0.01      |
| A-CD  | 0.45  | 4.59   | 71.4    | 0.6   | 0.01  | 0.01  | 8.4       |
| A-CD  | 4.07  | 283.51 | 62.72   | 2.04  | 5.46  | 1.15  | 29.54     |
| A-CD  | 3.87  | 5.23   | 88.79   | 1.1   | 2.16  | 1.47  | 24.36     |
| A-CD  | 3.52  | 22.06  | 21.39   | 4.18  | 5.36  | 2.06  | 14.25     |
| A-CD  | 4.34  | 82.65  | 396.37  | 1.19  | 1.81  | 1.04  | 9.39      |
| A-CD  | 1.82  | 9.54   | 380.8   | 1.03  | 0.77  | 0.93  | 12.19     |
| A-CD  | 2.83  | 13.13  | 636.33  | 1.03  | 0.77  | 0.93  | 13.19     |
| A-CD  | 12.26 | 18.99  | 688.88  | 0.01  | 0.01  | 0.01  | 1.43      |
| A-CD  | 5.49  | 25.09  | 109.5   | 1.81  | 4.58  | 2.09  | 30.02     |
| A-CD  | 29.99 | 71.76  | 2118    | 2.17  | 5.89  | 0.93  | 20.48     |
| A-CD  | 2.41  | 4.74   | 88.28   | 1.89  | 1.3   | 0.01  | 4.88      |
| A-CD  | 18.49 | 46.14  | 1684.13 | 1.68  | 0.67  | 1.78  | 41.64     |
| A-CD  | 0.4   | 23.77  | 35.37   | 0.6   | 1.56  | 0.01  | 25.31     |
| A-CD  | 2.12  | 8.46   | 33.65   | 1.33  | 3.1   | 0.19  | 13.06     |
| A-CD  | 1.75  | 55.65  | 256.32  | 1.33  | 0.47  | 1.43  | 3.07      |
| A-CD  | 3.26  | 14.33  | 195.68  | 0.01  | 0.01  | 1.69  | 10.44     |
| A-CD  | 2.64  | 13.54  | 230.67  | 1.21  | 0.01  | 0.01  | 13.15     |
| A-CD  | 2.26  | 24.52  | 153     | 0.83  | 3.57  | 1.13  | 28.09     |
| A-CD  | 3.21  | 32.65  | 255.68  | 0.42  | 0.02  | 0.01  | 6.23      |
| A-CD  | 8.35  | 126    | 652     | 1.25  | 2.96  | 2.46  | 9.1       |
| A-CD  | 2.78  | 2.46   | 14.69   | 0.52  | 4.74  | 0.91  | 20.16     |
| A-CD  | 3.23  | 11     | 161     | 2.58  | 2.77  | 1.49  | 9.77      |
| A-CD  | 0.78  | 2.4    | 9.93    | 0.73  | 0.42  | 0.13  | 13.15     |
| A-CD  | 18.7  | 16.1   | 54.81   | 11.96 | 6.36  | 2.76  | 38.18     |
| A-CD  | 2.44  | 8.2    | 34.6    | 1.2   | 2.74  | 1.3   | 8.01      |
| A-CD  | 3.51  | 14.68  | 26.83   | 3.52  | 5.77  | 2.11  | 42.43     |
| A-CD  | 1.04  | 18.45  | 13.45   | 0.82  | 0.51  | 1.39  | 11.5      |
| A-CD  | 2.85  | 8.33   | 234.9   | 0.07  | 0.24  | 0.01  | 5.35      |
| A-CD  | 2.85  | 8.33   | 234.9   | 0.07  | 0.24  | 0.01  | 5.35      |
| A-CD  | 3.71  | 7.83   | 93.45   | 1.57  | 2.9   | 1.32  | 47.59     |
| A-CD  | 3.16  | 16.23  | 10.19   | 2.19  | 3.57  | 1.84  | 38.72     |
| A-CD  | 2.08  | 32.5   | 101     | 0.59  | 2.07  | 0.16  | 15.98     |
| A-CD  | 1.78  | 89.5   | 44.33   | 1.65  | 1.13  | 0.01  | 18.66     |
| Re-CD | 1.19  | 3.11   | 67.34   |       | 1.41  | 0.18  | 1.31 8.37 |
| Re-CD | 52.61 | 5.58   | 129.18  |       | 11.84 | 11.94 | 0.01 9.98 |
| Re-CD | 3.23  | 12.41  | 127.63  | 1.53  | 0.89  | 0.22  | 12.26     |
| Re-CD | 0.18  | 2.89   | 60.35   | 0.85  | 1.98  | 0.01  | 14.34     |
| Re-CD | 2.44  | 1.85   | 29.99   | 0.91  | 0.01  | 0.17  | 8.37      |
| Re-CD | 2.38  | 2.62   | 58.9    | 1.1   | 0.35  | 0.17  | 10.54     |
| Re-CD | 1.54  | 16.06  | 82.72   | 0.8   | 1.69  | 0.68  | 0.01      |
| Re-CD | 2.31  | 8.82   | 22.95   | 2.91  | 3.39  | 1.45  | 25.16     |
| Re-CD | 6.91  | 13.13  | 36.01   | 2.46  | 2.55  | 2.52  | 26.62     |
| Re-CD | 3.06  | 5.52   | 32.01   | 2.74  | 4.44  | 2.12  | 26.17     |
| Re-CD | 3.08  | 4.01   | 169.37  | 0.59  | 1.05  | 0.01  | 7.39      |
| Re-CD | 0.85  | 1.55   | 7.69    | 0.36  | 0.99  | 0.27  | 11.35     |
| Re-CD | 10.66 | 15.02  | 439.84  | 3.9   | 1.12  | 2.64  | 19.59     |
| Re-CD | 2.41  | 5.55   | 251.55  | 0.64  | 0.56  | 0.21  | 12.9      |
| Re-CD | 2.06  | 6.22   | 18.3    | 2.18  | 3.59  | 1.79  | 12.19     |
| Re-CD | 20.38 | 87.42  | 576.73  | 1.8   | 1.3   | 0.94  | 27.67     |



|       |       |       |         |      |      |      |       |
|-------|-------|-------|---------|------|------|------|-------|
| Re-CD | 0.01  | 2.49  | 1.14    | 0.36 | 0.01 | 0.01 | 3.45  |
| Re-CD | 1.54  | 5.61  | 77.78   | 0.41 | 0.77 | 0.64 | 22.68 |
| Re-CD | 3.72  | 4.26  | 71.6    | 1    | 1.45 | 0.9  | 9.44  |
| Re-CD | 3.12  | 9.09  | 11.62   | 2.94 | 3.52 | 1.65 | 25.72 |
| Re-CD | 5.17  | 56.17 | 315     | 0.76 | 1.59 | 1.03 | 16.52 |
| Re-CD | 2.4   | 6.64  | 26.84   | 1.5  | 6.53 | 2.15 | 48    |
| Re-CD | 1.42  | 4.75  | 54.7    | 0.39 | 1.16 | 0.01 | 13.13 |
| Re-CD | 3.58  | 4.33  | 17.33   | 2.42 | 6.68 | 1.63 | 19.82 |
| Re-CD | 7.27  | 17.14 | 203.7   | 2.28 | 2.5  | 2.63 | 18.78 |
| Re-CD | 2.13  | 6.98  | 117     | 0.3  | 0.01 | 0.59 | 6.68  |
| Re-CD | 6     | 35.35 | 464     | 0.84 | 0.98 | 0.96 | 10    |
| Re-CD | 1.87  | 4.43  | 80.67   | 1.13 | 1.69 | 0.59 | 0.01  |
| Re-CD | 1.15  | 4.29  | 14.79   | 5.4  | 6.41 | 0.01 | 18.83 |
| Re-CD | 1.44  | 3.99  | 36.89   | 0.8  | 0.01 | 0.01 | 25.69 |
| Re-CD | 0.88  | 4.28  | 30.63   | 0.47 | 1.64 | 0.01 | 9.59  |
| Re-CD | 3.06  | 10.27 | 81.16   | 1.63 | 5.1  | 0.97 | 13.52 |
| Re-CD | 6.69  | 10.67 | 138     | 1.25 | 3.25 | 0.93 | 11.4  |
| Re-CD | 3     | 5.05  | 61.2    | 1    | 2.16 | 0.69 | 14.7  |
| Re-CD | 3.23  | 12.49 | 205.98  | 2.22 | 1.77 | 1.23 | 12.91 |
| Re-CD | 3.49  | 18.27 | 273.4   | 0.67 | 0.52 | 0.12 | 4.95  |
| Re-CD | 3.49  | 18.27 | 273     | 0.67 | 0.52 | 0.15 | 4.95  |
| Re-CD | 1.91  | 7.22  | 39.76   | 0.99 | 3.59 | 1.61 | 19.37 |
| Re-CD | 1.39  | 7.59  | 32.63   | 1.3  | 1.22 | 0.97 | 18.83 |
| Re-CD | 1.69  | 2.04  | 15.35   | 0.91 | 0.57 | 0.01 | 13.83 |
| Re-CD | 0.78  | 11.49 | 13.22   | 0.89 | 1.04 | 0.01 | 11.44 |
| Re-CD | 3.23  | 51.56 | 252.84  | 1.17 | 10.1 | 1.63 | 14.66 |
| Re-CD | 0.81  | 0.57  | 7.28    | 0.01 | 0.01 | 0.01 | 0.01  |
| Re-CD | 1.77  | 9.12  | 25.67   | 0.56 | 0.75 | 0.44 | 20.64 |
| Re-CD | 4.00  | 16.12 | 16.89   | 2.63 | 1.62 | 1.58 | 39.51 |
| Re-CD | 13.5  | 11.89 | 233     | 5.69 | 6.16 | 1.35 | 23.4  |
| Re-CD | 3.65  | 5.5   | 67.33   | 1.91 | 5.22 | 1.2  | 20.83 |
| Re-CD | 0.01  | 1.13  | 12.16   | 0.01 | 0.74 | 0.45 | 0.01  |
| Re-CD | 2.28  | 8.54  | 34.5    | 2.18 | 1.77 | 1.73 | 22.08 |
| Re-CD | 1.49  | 2.25  | 146.97  | 0.99 | 0.01 | 1.28 | 0.01  |
| Re-CD | 4.63  | 8.04  | 872     | 1.06 | 0.61 | 1.18 | 19.06 |
| A-UC  | 4.29  | 7.56  | 312     | 3.15 | 2.83 | 1.81 | 26.62 |
| A-UC  | 3.57  | 7.1   | 68.34   | 1.33 | 3.84 | 2.11 | 9.39  |
| A-UC  | 1.78  | 5.32  | 40.3    | 1.4  | 2.82 | 2.04 | 26.16 |
| A-UC  | 2.09  | 18.36 | 67.88   | 1.39 | 3.54 | 2.21 | 11.77 |
| A-UC  | 4.23  | 14.63 | 332     | 2.22 | 3.57 | 1.96 | 29.57 |
| A-UC  | 1.14  | 6.43  | 20.8    | 1.38 | 2.15 | 0.79 | 0.01  |
| A-UC  | 4.5   | 18.56 | 323.69  | 1.28 | 2.26 | 1.81 | 11.24 |
| A-UC  | 0.29  | 2.58  | 15.51   | 1.13 | 1.38 | 0.01 | 17.07 |
| A-UC  | 2.03  | 20.66 | 33.83   | 1.8  | 5.81 | 3.9  | 33.5  |
| A-UC  | 1.92  | 6.16  | 36.66   | 0.77 | 2.22 | 1.44 | 13.94 |
| A-UC  | 6.98  | 63.7  | 1305.56 | 2.79 | 6.94 | 5.47 | 18.9  |
| A-UC  | 3.22  | 27.77 | 667     | 0.63 | 0.60 | 0.52 | 9.09  |
| A-UC  | 6.74  | 11.6  | 54.05   | 3.62 | 1.47 | 1.85 | 14.71 |
| A-UC  | 0.02  | 4.81  | 22.44   | 1.09 | 0.01 | 0.01 | 7.61  |
| A-UC  | 1.67  | 3.66  | 12.54   | 0.72 | 0.9  | 1.16 | 7.24  |
| A-UC  | 0.01  | 4.89  | 46.07   | 0.52 | 0.42 | 0.13 | 13.55 |
| A-UC  | 2.18  | 8.71  | 89.74   | 0.56 | 1.28 | 0.25 | 11.87 |
| A-UC  | 15.89 | 34.84 | 506     | 7.55 | 0.01 | 3.4  | 16.28 |
| A-UC  | 1.96  | 4.03  | 75      | 2.21 | 5.84 | 1.42 | 17.84 |
| A-UC  | 1.44  | 16.17 | 123.63  | 0.34 | 0.01 | 0.32 | 8.4   |
| A-UC  | 3.72  | 37.1  | 1077.75 | 2.29 | 1.81 | 1.63 | 22.98 |
| A-UC  | 1.06  | 11.5  | 120.4   | 1.59 | 3.23 | 1.04 | 0.01  |
| A-UC  | 4.93  | 93.71 | 241.69  | 1.5  | 2.23 | 0.91 | 19.43 |

|       |       |       |        |       |      |      |       |
|-------|-------|-------|--------|-------|------|------|-------|
| A-UC  | 11.35 | 12.74 | 763.15 | 4.9   | 5.17 | 2.44 | 36    |
| A-UC  | 3.99  | 14    | 342    | 1.94  | 2.35 | 2.01 | 13.97 |
| Re-UC | 1.8   | 4.45  | 52.08  | 0.86  | 1.47 | 2.16 | 10.19 |
| Re-UC | 3.31  | 9.01  | 49.63  | 1.09  | 1.19 | 0.72 | 16.89 |
| Re-UC | 3.52  | 11.97 | 31.52  | 2.3   | 3.94 | 1.76 | 9.98  |
| HC    | 0.02  | 3.11  | 29.02  | 1.05  | 2.24 | 0.23 | 12.76 |
| HC    | 1.66  | 10.17 | 31.13  | 1.21  | 3.02 | 0.97 | 16.67 |
| HC    | 4.44  | 11.52 | 56.79  | 4.84  | 1.12 | 2.7  | 11.83 |
| HC    | 0.08  | 1.78  | 12.93  | 0.68  | 2.67 | 0.01 | 10.78 |
| HC    | 6.39  | 17.45 | 12.81  | 4.9   | 8.08 | 3.6  | 41.53 |
| HC    | 0.01  | 4.47  | 5.67   | 0.73  | 1.64 | 0.01 | 19.84 |
| HC    | 1.78  | 5.26  | 11.84  | 1.62  | 4.66 | 1.46 | 29.54 |
| HC    | 0.67  | 4.28  | 160.99 | 0.11  | 2.45 | 0.01 | 9.19  |
| HC    | 0.57  | 3.44  | 8.97   | 0.45  | 0.8  | 0.01 | 16.2  |
| HC    | 2.67  | 5.81  | 60.4   | 1.75  | 1.51 | 1.16 | 11.3  |
| HC    | 1.95  | 17.11 | 55.82  | 0.73  | 1.38 | 0.01 | 12.36 |
| HC    | 2.18  | 3.99  | 197.33 | 1.41  | 2.41 | 0.17 | 11.57 |
| HC    | 0.99  | 4.74  | 89.53  | 0.43  | 5.23 | 0.01 | 2.49  |
| HC    | 1.49  | 3.94  | 22.04  | 1.9   | 2.89 | 1.08 | 22.08 |
| HC    | 4.58  | 37.37 | 1170   | 0.73  | 0.33 | 0.26 | 9.59  |
| HC    | 3.07  | 3.53  | 83.37  | 1.48  | 2.29 | 0.96 | 19.2  |
| HC    | 1.92  | 3.87  | 16.2   | 0.46  | 0.40 | 0.69 | 7.7   |
| HC    | 14.08 | 2.6   | 53.58  | 13.17 | 0.01 | 0.01 | 8.63  |

| GCDCA | GUDCA | GLCA  | TCA  | TDCA  | TCDCA | TUDCA | TLCA   |
|-------|-------|-------|------|-------|-------|-------|--------|
| 67.5  | 2.07  | 1.24  | 8.4  | 0     | 16.6  | 0     | 0.226  |
| 478   | 47.7  | 40.6  | 4.3  | 3.54  | 12.6  | 0     | 0      |
| 231   | 57.2  | 0.499 | 41.3 | 0     | 165   | 12.4  | 0.156  |
| 9.89  | 10.2  | 12.9  | 1.16 | 0     | 0.78  | 0.74  | 0.38   |
| 78.2  | 7.66  | 0.11  | 4.19 | 0     | 12.4  | 0     | 0      |
| 255   | 0     | 0.457 | 23.4 | 0     | 31.9  | 0     | 0.492  |
| 68.4  | 61.3  | 2.81  | 0    | 0     | 2.97  | 0     | 1.48   |
| 676   | 62.9  | 1.9   | 32.1 | 0     | 184   | 5.81  | 0      |
| 762   | 203   | 0.535 | 18.3 | 0     | 80.1  | 8.6   | 0      |
| 602   | 75.3  | 7.39  | 36   | 8.76  | 46.9  | 1.48  | 0.16   |
| 108   | 38.3  | 3.4   | 28.7 | 23.7  | 58.8  | 4.08  | 2.29   |
| 968   | 3.62  | 0.32  | 151  | 0     | 90.1  | 0     | 0      |
| 437   | 0     | 0.653 | 9.8  | 0     | 64.1  | 0     | 0      |
| 95.2  | 136   | 0.819 | 4.19 | 0     | 25.9  | 7.09  | 0.101  |
| 598   | 46.1  | 0.49  | 2    | 0     | 30.1  | 1.09  | 0.31   |
| 1910  | 710   | 0     | 29.5 | 0     | 268   | 31.2  | 0.38   |
| 794   | 144   | 0     | 15.4 | 0     | 44.1  | 0     | 0      |
| 1230  | 151   | 17.2  | 16.1 | 13.6  | 131   | 3.85  | 2.12   |
| 592   | 15.3  | 0     | 58.2 | 0     | 185   | 1.87  | 0      |
| 488   | 89.9  | 0     | 0    | 0     | 17.4  | 1.79  | 0      |
| 253   | 92.5  | 4.94  | 2.68 | 1.68  | 9.04  | 0.556 | 0.59   |
| 754   | 137   | 1.08  | 0    | 15.1  | 102   | 1.76  | 3.86   |
| 390   | 36.9  | 0     | 1.12 | 0     | 6.98  | 0.91  | 0      |
| 616   | 120   | 0     | 65.6 | 0     | 169   | 11.9  | 0      |
| 485   | 186   | 2.36  | 12.9 | 7.49  | 49.4  | 6.3   | 0.127  |
| 257   | 80.8  | 3.25  | 14.7 | 17.9  | 49.7  | 4.67  | 0.648  |
| 204   | 2.88  | 0     | 26.4 | 0     | 39.1  | 0.6   | 0.14   |
| 195   | 0     | 0     | 8.34 | 0     | 8.13  | 0     | 0      |
| 403   | 0     | 131   | 15.4 | 0     | 68.7  | 3.43  | 1.45   |
| 229   | 0     | 0     | 27.5 | 13.5  | 50.4  | 0     | 0      |
| 311   | 29.9  | 0     | 37.9 | 0.246 | 82.1  | 3.5   | 0.12   |
| 341   | 304   | 1.91  | 3.09 | 0.719 | 24.7  | 8.41  | 0.259  |
| 253   | 23    | 0     | 13.9 | 0     | 39    | 1.58  | 0      |
| 393   | 67.8  | 0.4   | 4.88 | 0     | 21.3  | 0     | 0      |
| 788   | 111   | 2.07  | 87.4 | 0     | 322   | 9.53  | 0      |
| 285   | 0     | 0.108 | 12.4 | 0     | 50.2  | 0     | 0.64   |
| 530   | 0     | 0.817 | 16.6 | 0     | 56    | 0.402 | 0.102  |
| 758   | 14.4  | 0     | 61   | 0     | 231   | 0     | 0      |
| 0     | 0     | 9.29  | 0    | 0     | 1.59  | 0     | 0.0352 |
| 545   | 21.1  | 0     | 16.4 | 0     | 76.2  | 0     | 0      |
| 287   | 173   | 0.595 | 9.29 | 0     | 32.2  | 5.86  | 0      |
| 97.9  | 96.7  | 0.325 | 1.27 | 0     | 4.7   | 0.989 | 0.226  |
| 103   | 15.3  | 1.9   | 3.84 | 2.03  | 13.4  | 0.242 | 0.34   |
| 1080  | 22    | 2.02  | 8.19 | 0     | 54.2  | 0.09  | 0      |
| 341   | 140   | 0     | 32.7 | 3.11  | 44.3  | 2.64  | 0      |
| 4810  | 396   | 0     | 281  | 0     | 446   | 0     | 0      |
| 1460  | 184   | 0.686 | 93.7 | 1.76  | 437   | 26    | 0      |
| 1050  | 0     | 2.45  | 20.1 | 0     | 58.3  | 0     | 0      |
| 1770  | 192   | 0     | 6.18 | 0     | 56.8  | 1.02  | 0      |
| 293   | 32    | 1.15  | 0.06 | 0     | 6.89  | 0     | 0      |
| 1110  | 27.2  | 0     | 243  | 0.39  | 668   | 7.45  | 0.39   |
| 431   | 4.99  | 0     | 12.2 | 0     | 79.6  | 0     | 0      |
| 1620  | 0     | 0.831 | 29.3 | 0     | 75.5  | 0     | 0.13   |
| 811   | 54.3  | 3.48  | 24.4 | 22.3  | 109   | 2.49  | 1.73   |
| 8140  | 110   | 0     | 163  | 0     | 331   | 1.95  | 0      |
| 901   | 2.13  | 0.14  | 21.6 | 0     | 46.1  | 0     | 0      |

|      |      |        |        |       |      |       |        |
|------|------|--------|--------|-------|------|-------|--------|
| 155  | 0    | 0      | 9.87   | 0     | 15.4 | 0     | 0      |
| 272  | 99.5 | 0.157  | 6.18   | 0     | 13.2 | 1.36  | 0      |
| 1250 | 702  | 0.35   | 76     | 0     | 209  | 31.6  | 0      |
| 370  | 0.31 | 0      | #NULL! | 0     | 18.2 | 0     | 0.73   |
| 1390 | 72.8 | 0      | 12.2   | 0     | 44.1 | 0     | 0.54   |
| 547  | 25.1 | 0.995  | 2      | 0     | 9.14 | 0     | 0.153  |
| 585  | 37   | 3.38   | 13.2   | 10.2  | 46.4 | 0     | 0      |
| 569  | 9.17 | 0      | 14.7   | 0     | 49.8 | 0     | 0      |
| 466  | 72.3 | 8.05   | 8.9    | 8.93  | 34.3 | 1.22  | 0      |
| 612  | 332  | 0      | 0      | 9.6   | 38.2 | 8.91  | 0      |
| 33.9 | 0    | 2.29   | 1.27   | 0     | 1.24 | 0.411 | 0      |
| 1570 | 0    | 0      | 198    | 0     | 100  | 0     | 0      |
| 482  | 0    | 0.0847 | 306    | 0     | 53.9 | 0.907 | 0.15   |
| 511  | 49   | 0.24   | 4.46   | 0     | 57.5 | 0     | 0.34   |
| 888  | 14.7 | 0.76   | 34     | 0     | 111  | 0     | 0.432  |
| 1070 | 365  | 1.36   | 30.6   | 21.4  | 109  | 9.22  | 0      |
| 148  | 65.9 | 0      | 17.8   | 0     | 0    | 1.83  | 0      |
| 72.9 | 28.8 | 16.6   | 0.645  | 3.73  | 6.35 | 0.874 | 0.688  |
| 131  | 23.8 | 0      | 7.76   | 0     | 1.91 | 1.32  | 0      |
| 1070 | 324  | 0.482  | 31.2   | 0.629 | 60.8 | 5.89  | 0.182  |
| 262  | 240  | 0      | 16.3   | 0     | 68.7 | 14.1  | 0      |
| 311  | 0    | 0.34   | 36.5   | 0     | 36.3 | 0     | 0.153  |
| 853  | 179  | 0.83   | 14.5   | 20.5  | 118  | 3.49  | 1.85   |
| 138  | 84.7 | 0      | 2.74   | 0     | 8.7  | 0.86  | 0      |
| 1770 | 981  | 36.9   | 20.5   | 56    | 111  | 18.7  | 4.33   |
| 765  | 364  | 99     | 2.53   | 21.9  | 77.5 | 7.86  | 4.69   |
| 742  | 274  | 2.37   | 9.55   | 0.829 | 62.2 | 8.58  | 0      |
| 214  | 0    | 0.535  | 23     | 0     | 27.9 | 1.03  | 0.718  |
| 215  | 15.8 | 1.25   | 13.9   | 0     | 61.8 | 0.392 | 0.205  |
| 3180 | 556  | 0.307  | 26.9   | 0     | 266  | 23.1  | 0      |
| 691  | 29.6 | 0.167  | 152    | 3.17  | 403  | 8.15  | 0.0241 |
| 531  | 7.72 | 0.665  | 15     | 0     | 70.3 | 1.72  | 0.0867 |
| 916  | 9.89 | 0      | 6.13   | 0     | 19.8 | 1.2   | 0      |
| 447  | 10.8 | 0      | 3.22   | 0     | 22.7 | 0     | 0      |
| 56.3 | 0    | 0.591  | 3.26   | 0     | 15   | 0     | 0.346  |
| 174  | 8.18 | 0      | 4.13   | 0     | 27.3 | 0     | 0      |
| 295  | 92.1 | 0.52   | 26.7   | 12.6  | 52   | 6.05  | 0.82   |
| 688  | 424  | 0      | 25.1   | 0     | 103  | 16.6  | 0      |
| 814  | 0    | 7.02   | 7.13   | 8.77  | 37.3 | 0     | 0      |
| 1590 | 9.66 | 2      | 20.1   | 0     | 156  | 0     | 0.94   |
| 186  | 60.3 | 2.03   | 0      | 0     | 11.5 | 0.2   | 0      |
| 646  | 341  | 0      | 17.1   | 0     | 57.2 | 8.99  | 0      |
| 227  | 89.2 | 0      | 2.35   | 0     | 9.74 | 0.333 | 0      |
| 390  | 173  | 0      | 18.4   | 8.58  | 91.2 | 10.6  | 0      |
| 1370 | 0    | 0      | 39.3   | 0     | 128  | 0     | 0      |
| 1070 | 923  | 0.522  | 10.2   | 0     | 73.8 | 22.8  | 0.134  |
| 1040 | 130  | 0      | 13.5   | 0     | 150  | 7.08  | 0      |
| 488  | 214  | 0      | 17.3   | 0     | 46.7 | 5.71  | 0      |
| 630  | 422  | 4      | 17.2   | 0     | 150  | 37.2  | 0      |
| 285  | 153  | 5.34   | 0      | 0     | 0    | 0.3   | 0      |
| 421  | 21.7 | 0      | 11.3   | 0     | 17.5 | 0     | 1.38   |
| 554  | 71.4 | 0      | 20.3   | 0     | 84.1 | 2.11  | 0      |
| 308  | 21.5 | 0      | 4.85   | 0     | 18.3 | 0     | 0      |
| 202  | 113  | 1.06   | 1.31   | 0     | 5.12 | 0.477 | 0.399  |
| 1150 | 543  | 3.12   | 15     | 8.21  | 90   | 15    | 0      |
| 274  | 13.9 | 0      | 4.21   | 0     | 4.86 | 0.58  | 0.04   |
| 154  | 123  | 0      | 0.85   | 0     | 6.67 | 1.46  | 0      |
| 1950 | 1190 | 0      | 7.02   | 0     | 40.4 | 8.6   | 0      |

|       |      |        |      |      |      |       |        |
|-------|------|--------|------|------|------|-------|--------|
| 223   | 51.2 | 5.11   | 2.32 | 7.23 | 15.8 | 1.77  | 0.995  |
| 1470  | 539  | 0      | 13.4 | 0    | 62.1 | 9.27  | 0      |
| 117   | 13.8 | 5.11   | 4.5  | 4.98 | 7.47 | 0     | 0      |
| 6670  | 628  | 0.704  | 27.1 | 0    | 255  | 12    | 0      |
| 4660  | 177  | 2.76   | 140  | 64.7 | 732  | 0     | 1.52   |
| 105   | 69.8 | 0      | 0    | 0    | 3.88 | 0     | 0.3    |
| 89    | 12.8 | 0      | 0    | 0    | 1.55 | 0     | 0      |
| 962   | 191  | 0      | 4.51 | 0    | 68   | 3.87  | 0      |
| 1320  | 436  | 0.13   | 12.6 | 0    | 127  | 17.6  | 0.64   |
| 99920 | 1710 | 0      | 508  | 0    | 2360 | 156   | 0.15   |
| 1210  | 67.3 | 3.18   | 0    | 0    | 5.08 | 0     | 0      |
| 857   | 445  | 13.4   | 19.4 | 27   | 14.8 | 0     | 0      |
| 1640  | 11.3 | 0      | 42.9 | 0    | 327  | 1.22  | 0      |
| 1050  | 131  | 0      | 9.62 | 0    | 128  | 0     | 0.89   |
| 208   | 57.7 | 4.58   | 5.03 | 9.81 | 23.9 | 1.71  | 0.492  |
| 480   | 26.4 | 0      | 5.79 | 1.26 | 13.1 | 0     | 0.1    |
| 495   | 59.1 | 3.51   | 26.6 | 15.9 | 123  | 7.66  | 1.1    |
| 158   | 79.6 | 5.18   | 6.29 | 9.15 | 25.2 | 3.66  | 0      |
| 101   | 20.1 | 9.98   | 6.01 | 10   | 10   | 5     | 2      |
| 1130  | 74.1 | 0      | 54.6 | 2.84 | 190  | 5.35  | 0.928  |
| 3000  | 72.8 | 3.08   | 22.5 | 0    | 211  | 0.51  | 0      |
| 118   | 49.7 | 0.675  | 6.11 | 4.05 | 28.9 | 5.57  | 0.209  |
| 395   | 120  | 0.807  | 12.3 | 9.01 | 60.5 | 5.03  | 0      |
| 791   | 68.1 | 5.95   | 50.6 | 32.4 | 145  | 4.68  | 1.85   |
| 159   | 3.06 | 0      | 16.6 | 1.06 | 24.8 | 0     | 0.312  |
| 469   | 142  | 0.718  | 10.5 | 2.75 | 32.2 | 3.38  | 0.213  |
| 249   | 52.2 | 1.38   | 32.2 | 6.18 | 118  | 9.74  | 0.3    |
| 6470  | 334  | 3.19   | 80   | 11.1 | 456  | 5.66  | 0      |
| 1820  | 783  | 0      | 13.5 | 0    | 125  | 23.7  | 0      |
| 408   | 62.7 | 0      | 4.77 | 0    | 57.2 | 2.28  | 0      |
| 651   | 21.7 | 1.51   | 0    | 0    | 65.9 | 4.61  | 0      |
| 591   | 19.6 | 0      | 20.8 | 0    | 53.1 | 1.05  | 0      |
| 1180  | 31.6 | 0      | 40   | 0    | 183  | 0     | 0      |
| 2850  | 1410 | 0.833  | 26.1 | 0    | 305  | 49.6  | 0.115  |
| 400   | 184  | 0      | 17.3 | 0    | 77.1 | 11.8  | 0.69   |
| 780   | 16.5 | 0      | 33.6 | 0    | 139  | 0     | 0.18   |
| 1190  | 31.1 | 0      | 67.7 | 0    | 119  | 0     | 0.14   |
| 1120  | 123  | 0      | 22.3 | 0    | 131  | 4.51  | 0      |
| 108   | 16.2 | 0      | 2.39 | 0    | 15   | 1.91  | 0      |
| 109   | 1.32 | 0      | 1.95 | 0    | 12.2 | 0     | 0.31   |
| 269   | 139  | 3.26   | 0.97 | 0    | 25.5 | 3.98  | 0      |
| 272   | 185  | 1.99   | 7.61 | 0.33 | 24   | 3.1   | 0      |
| 816   | 131  | 0      | 16.2 | 0.83 | 90.7 | 5.15  | 0.83   |
| 213   | 13.9 | 1.34   | 3.85 | 1.79 | 36.6 | 0     | 0.257  |
| 698   | 21.8 | 0.0767 | 4.8  | 0    | 75.7 | 0.276 | 0.0498 |
| 332   | 45.9 | 11.6   | 31   | 16.9 | 46   | 1.61  | 1.43   |
| 65.4  | 0    | 2.05   | 1.63 | 5.1  | 11.5 | 0     | 0.157  |
| 98.9  | 37.1 | 2.9    | 2.82 | 1.04 | 17.1 | 0.412 | 0.474  |
| 221   | 66.3 | 1.39   | 3.82 | 3.1  | 29.3 | 3.1   | 0.465  |
| 149   | 22.5 | 0.199  | 17.4 | 0    | 19.2 | 2.04  | 0.647  |
| 38.7  | 0    | 0.271  | 3.9  | 0    | 18.3 | 0     | 0.655  |
| 197   | 132  | 3.03   | 4.97 | 7.44 | 22.1 | 4.68  | 0.834  |
| 489   | 26.7 | 11.5   | 9.55 | 35.4 | 94.2 | 1.13  | 0.77   |
| 596   | 313  | 0      | 7.97 | 0    | 54.1 | 8.2   | 0.178  |
| 189   | 32.1 | 2.01   | 10.4 | 12.3 | 41.2 | 0.962 | 0.191  |
| 616   | 189  | 3.35   | 12.6 | 7.72 | 87   | 9.29  | 0.649  |
| 278   | 27.2 | 1.25   | 32.2 | 47.6 | 220  | 7.06  | 2.92   |
| 3130  | 558  | 2.59   | 844  | 4.13 | 1700 | 125   | 1.17   |

|      |      |       |      |       |      |        |        |
|------|------|-------|------|-------|------|--------|--------|
| 597  | 30.8 | 5.59  | 19.8 | 15    | 69.6 | 0.593  | 1.29   |
| 359  | 90   | 0.136 | 7.9  | 1.69  | 100  | 9.15   | 0.542  |
| 196  | 23.2 | 3.49  | 1.25 | 0     | 11.8 | 0      | 0.62   |
| 223  | 81.2 | 0     | 6.06 | 8.37  | 36.7 | 3.16   | 1.36   |
| 247  | 39.6 | 1.27  | 59.7 | 4.7   | 168  | 9.17   | 0.336  |
| 938  | 101  | 2.96  | 18.1 | 0     | 152  | 4.25   | 0.43   |
| 1530 | 463  | 93.8  | 52.1 | 42.9  | 188  | 18     | 3.8    |
| 720  | 19.2 | 0.767 | 28.6 | 3.57  | 97.2 | 1.97   | 0.434  |
| 29.8 | 6.28 | 4.15  | 0.65 | 1.15  | 10.2 | 1.38   | 0.401  |
| 167  | 8.32 | 4.32  | 3    | 6.41  | 14.6 | 0      | 1.22   |
| 55.2 | 7.4  | 9.34  | 6.31 | 7.54  | 16.6 | 0.208  | 0.65   |
| 220  | 94.8 | 0     | 8.15 | 0     | 58   | 10.8   | 0      |
| 327  | 107  | 7.68  | 5.56 | 11.4  | 60.4 | 6.88   | 2.83   |
| 473  | 120  | 1.81  | 7.22 | 0     | 64.7 | 2.7    | 0      |
| 328  | 31.9 | 0     | 3.29 | 0     | 19.1 | 0      | 0      |
| 69.4 | 14.9 | 13.8  | 3.36 | 4.45  | 11.3 | 0.346  | 0.893  |
| 1460 | 266  | 2.14  | 20.6 | 16.5  | 222  | 14.7   | 0.56   |
| 822  | 9.41 | 0.986 | 21.8 | 0     | 140  | 0.0333 | 0.362  |
| 1310 | 396  | 20.5  | 10.1 | 20.9  | 101  | 9.71   | 1.1    |
| 3230 | 228  | 1.33  | 115  | 0     | 782  | 22.4   | 0.928  |
| 2830 | 560  | 0     | 186  | 5.18  | 570  | 43.9   | 0.164  |
| 291  | 59.2 | 0.535 | 12.5 | 13    | 63.4 | 2.91   | 0      |
| 753  | 175  | 0.916 | 18.3 | 0     | 73.3 | 4.46   | 0      |
| 312  | 25.8 | 4.98  | 3.48 | 1.53  | 15.6 | 0.206  | 0.489  |
| 464  | 124  | 0     | 14.7 | 0.491 | 99.3 | 8.84   | 0      |
| 1030 | 418  | 0     | 23.6 | 0     | 55.9 | 7.64   | 0.239  |
| 354  | 98.8 | 0.648 | 15.5 | 0.769 | 55.2 | 4.47   | 0      |
| 930  | 271  | 16    | 40.8 | 46.5  | 127  | 13.9   | 2.19   |
| 946  | 319  | 0.923 | 9.57 | 0     | 43   | 5.99   | 0      |
| 117  | 20.9 | 21.4  | 10.2 | 0     | 20.9 | 0      | 0      |
| 743  | 256  | 0.737 | 9.85 | 0     | 41.6 | 4.51   | 0.0181 |
| 829  | 229  | 0     | 14.3 | 0.57  | 60.3 | 6.59   | 0      |
| 495  | 20.2 | 0.716 | 8.48 | 0     | 50.9 | 1.52   | 0.361  |
| 240  | 112  | 0.308 | 7.53 | 6.92  | 43.7 | 6.76   | 0      |
| 1310 | 15.5 | 0.246 | 7.06 | 4.04  | 92.4 | 0.859  | 0      |
| 382  | 38.3 | 33.1  | 7.69 | 46    | 91.5 | 4.23   | 1.86   |
| 117  | 6.29 | 0.636 | 13   | 0     | 35.5 | 0      | 0.235  |
| 579  | 354  | 0     | 7.8  | 3.75  | 37.1 | 6.43   | 0.33   |
| 5210 | 924  | 6.94  | 126  | 78.8  | 1160 | 87.5   | 2.69   |
| 328  | 90.8 | 3.96  | 11.8 | 6.23  | 112  | 5.91   | 0.803  |
| 672  | 57.9 | 18.5  | 11.3 | 29.7  | 56.6 | 0      | 2.88   |
| 1480 | 425  | 3.85  | 7.42 | 1.42  | 39.8 | 3.69   | 0.159  |
| 166  | 14.5 | 5.34  | 8.78 | 5.1   | 13.3 | 0.198  | 0.364  |

| HC       | HC.aver  | CD.aver  | log2(CD/HP-value | VIP      |          |
|----------|----------|----------|------------------|----------|----------|
| 115543.7 | 75475.59 | 0        | -26.16           | 0.000903 | 1.1538   |
| 183.5525 | 221.27   | 132.7    | -0.73            | 0.24735  | 0.36269  |
| 167.122  | 2491.66  | 5891.27  | 1.24             | 0.98001  | 0.017944 |
| 14338.12 | 15903.21 | 27630.58 | 0.79             | 0.66758  | 0.18798  |
| 4051.891 | 8392.5   | 53614.1  | 2.67             | 0.89221  | 0.11217  |
| 13201.94 | 5422.94  | 21.63    | -7.96            | 0.000785 | 1.8058   |
| 52627.32 | 81942.19 | 77008.3  | -0.08            | 0.32454  | 0.62271  |
| 13371.26 | 94940.02 | 89938.66 | -0.07            | 0.60795  | 0.30431  |
| 0        | 136.92   | 2360.77  | 4.1              | 0.81277  | 0.16607  |
| 7142.325 | 116258.9 | 221406.6 | 0.92             | 0.89156  | 0.11226  |
| 476077.3 | 574599.6 | 9668.15  | -5.89            | 0.00686  | 2.2941   |

|          |          |          |        |          |          |
|----------|----------|----------|--------|----------|----------|
| 4820.308 | 2209.33  | 19257.85 | 3.12   | 0.51506  | 0.40265  |
| 893.08   | 441.01   | 14742.81 | 5.06   | 0.11676  | 0.96596  |
| 1708.534 | 637.56   | 59.99    | -3.4   | 0.10926  | 0.72308  |
| 1108.749 | 598.9    | 371.88   | -0.68  | 0.30436  | 0.40475  |
| 55.30652 | 18.43    | 0        | -14.17 | 0.21994  | 0.21174  |
| 301.1762 | 141.67   | 2623.99  | 4.21   | 0.13476  | 0.83605  |
| 25998.5  | 50794.77 | 116660.7 | 1.19   | 0.64605  | 0.36245  |
| 14202.12 | 5432.95  | 11.78    | -8.84  | 0.000752 | 1.9707   |
| 67.5046  | 30.01    | 342.19   | 3.51   | 0.44912  | 0.52631  |
| 913.2976 | 366.11   | 8500.2   | 4.53   | 0.42558  | 0.60416  |
| 493.7498 | 284.59   | 9870.74  | 5.11   | 0.24154  | 0.86977  |
| 2634.299 | 1006.5   | 38.13    | -4.72  | 0.048646 | 1.2618   |
| 608.078  | 202.69   | 301.64   | 0.57   | 0.81069  | 0.073174 |
| 103.7497 | 64.2     | 1405.09  | 4.45   | 0.22273  | 0.78602  |
| 0        | 8.55     | 7.21     | -0.24  | 0.82961  | 0.057719 |
| 69.07215 | 48.4     | 1676.84  | 5.11   | 0.18255  | 0.92216  |
| 28323.78 | 51666.18 | 116340   | 1.17   | 0.64684  | 0.35068  |
| 1735222  | 1278845  | 2024.8   | -9.3   | 0.00129  | 2.7264   |
| 972.1583 | 35218.13 | 1016.05  | -5.11  | 0.23218  | 0.93793  |

| UC       | UC       | UC       | CD.aver  | UC.aver  | log2(UC/C | P-value  | VIP      |
|----------|----------|----------|----------|----------|-----------|----------|----------|
| 20.39068 | 0        | 73.98407 | 2623.99  | 25.97    | -6.65     | 0.004979 | 2.6737   |
| 0        | 0        | 0        | 1676.84  | 50.36    | -5.05     | 0.024821 | 1.5749   |
| 663.0265 | 0        | 0        | 77008.3  | 6893.49  | -3.48     | 0.11569  | 2.0546   |
| 54.51206 | 22.32199 | 432.855  | 1405.09  | 160.31   | -3.13     | 0.2319   | 1.2686   |
| 313.3093 | 0        | 126581.8 | 116660.7 | 25588.61 | -2.18     | 0.23593  | 1.8061   |
| 502.3684 | 0        | 137963.6 | 116340   | 27933.43 | -2.05     | 0.23666  | 1.7115   |
| 0        | 0        | 687.464  | 2024.8   | 420.81   | -2.26     | 0.25597  | 0.83111  |
| 715.4202 | 59.0186  | 3100.375 | 2360.77  | 1102.03  | -1.09     | 0.26113  | 1.2424   |
| 360.0177 | 269.2323 | 1359.549 | 19257.85 | 1025.65  | -4.23     | 0.26783  | 1.0289   |
| 3551.927 | 0        | 0        | 9668.15  | 710.38   | -3.76     | 0.27522  | 0.94587  |
| 5823.854 | 332.9525 | 336.1177 | 14742.81 | 1960.1   | -2.91     | 0.2855   | 0.85678  |
| 0        | 0        | 16645.18 | 27630.58 | 3329.03  | -3.05     | 0.30913  | 0.58947  |
| 0        | 0        | 0        | 342.19   | 137.27   | -1.31     | 0.34642  | 0.51498  |
| 0        | 0        | 0        | 21.63    | 0        | -14.4     | 0.34659  | 0.21689  |
| 0        | 0        | 110.07   | 0        | 22.01    | 14.42     | 0.34659  | 0.21689  |
| 0        | 0        | 0        | 11.78    | 0        | -13.52    | 0.34659  | 0.21686  |
| 0        | 0        | 0        | 7.21     | 0        | -12.81    | 0.34659  | 0.2168   |
| 0        | 0        | 1442.08  | 0        | 288.41   | 18.13     | 0.34659  | 0.2169   |
| 25.75247 | 0        | 197.0389 | 5891.27  | 959.09   | -2.61     | 0.38699  | 1.1587   |
| 23.26572 | 0        | 75.74914 | 132.7    | 84.54    | -0.65     | 0.48195  | 0.42843  |
| 176.8015 | 0        | 0        | 59.99    | 35.36    | -0.76     | 0.60499  | 0.22391  |
| 65.27054 | 90.80845 | 407.2732 | 8500.2   | 3122.01  | -1.44     | 0.64278  | 0.52172  |
| 14185.5  | 0        | 63328.22 | 221406.6 | 86958.78 | -1.34     | 0.66683  | 0.60049  |
| 457.2915 | 51.66074 | 2400.899 | 1016.05  | 1104.91  | 0.12      | 0.67955  | 0.34316  |
| 10714.79 | 0        | 69850.78 | 89938.66 | 31758.18 | -1.5      | 0.74076  | 0.28093  |
| 491.2494 | 0        | 10866.87 | 53614.1  | 13541.73 | -1.98     | 0.76989  | 0.38907  |
| 292.1307 | 0        | 0        | 38.13    | 58.42    | 0.61      | 0.87353  | 0.057482 |
| 6303.388 | 98.36597 | 726.9554 | 9870.74  | 4106.51  | -1.26     | 0.91092  | 0.11754  |
| 0        | 0        | 1239.344 | 371.88   | 327.02   | -0.18     | 0.91749  | 0.059251 |
| 0        | 0        | 991.0929 | 301.64   | 349.5    | 0.21      | 0.92303  | 0.045767 |

UC  
0.201634  
0.09259  
0  
0.685351  
0.018722

0.001702  
0

kind  
phylum  
phylum  
phylum  
phylum  
phylum  
phylum  
phylum

kind  
class  
class

kind  
domain  
domain

kind  
family  
family  
family  
family  
family  
family  
family















species  
species

DSS+Water

| 100      | 100      | 100      | 100      | 100      | 100      | 100      | 100      |
|----------|----------|----------|----------|----------|----------|----------|----------|
| 109.0395 | 106.7416 | 107.4866 | 105.4945 | 102.6178 | 104.0936 | 106.1111 | 107.5676 |
| 109.0395 | 107.3034 | 106.9519 | 105.4945 | 102.0942 | 104.6784 | 106.1111 | 106.4865 |
| 110.1695 | 102.2472 | 102.139  | 104.3956 | 101.0471 | 115.7895 | 102.2222 | 97.83784 |
| 104.5198 | 102.809  | 103.2086 | 101.0989 | 104.712  | 107.6023 | 103.8889 | 105.4054 |
| 106.2147 | 101.6854 | 98.39572 | 103.2967 | 102.6178 | 103.5088 | 103.8889 | 101.0811 |
| 107.3446 | 100.5618 | 103.7433 | 101.6484 | 98.95288 | 105.848  | 103.8889 | 103.7838 |
| 103.9548 | 93.82022 | 92.51337 | 98.35165 | 96.85864 | 97.66082 | 100.5556 | 97.2973  |
| 110.7345 | 97.75281 | 97.3262  | 98.35165 | 95.81152 | 98.83041 | 101.1111 | 100.5405 |
| 102.1053 | 96.08939 | 91.23711 | 91.35135 | 95.2381  | 92.26519 | 97.3262  | 93.75    |
| 111.2994 | 98.31461 | 102.6738 | 95.6044  | 97.90576 | 98.83041 | 104.4444 | 102.7027 |
| 109.6045 | 102.2472 | 101.6043 | 102.7473 | 105.2356 | 101.7544 | 107.2222 | 108.6486 |





| DW3      | DW4      | DW5      | DW6      | DW7      | WD1      | WD2      | WD3      | WD4      |
|----------|----------|----------|----------|----------|----------|----------|----------|----------|
| 0        | 0        | 0        | 0        | 0        | 0        | 0        | 0        | 0        |
| 0.002795 | 0.00772  | 0.003993 | 0.020098 | 0.007054 | 0.008519 | 0.006123 | 0.018634 | 0.015706 |
| 0.127512 | 0.225343 | 0.425263 | 0.069346 | 0.060429 | 0.080926 | 0.068814 | 0.045255 | 0.031678 |
| 0        | 0.022494 | 0.008918 | 0        | 0.000932 | 0.001597 | 0.001198 | 0.001997 | 0.00173  |
| 0        | 0.000266 | 0.000532 | 0        | 0.000399 | 0        | 0.000532 | 0        | 0.000532 |
| 0.834154 | 0.63104  | 0.463596 | 0.794356 | 0.860775 | 0.870491 | 0.885665 | 0.894982 | 0.854519 |
| 0.035405 | 0.112605 | 0.096899 | 0.111407 | 0.06948  | 0.038067 | 0.037535 | 0.038733 | 0.094902 |
| 0        | 0        | 0        | 0        | 0        | 0        | 0        | 0        | 0        |
| 0.000133 | 0.000532 | 0.000799 | 0.004792 | 0.000532 | 0.000266 | 0.000133 | 0.000399 | 0.000932 |
| 0        | 0        | 0        | 0        | 0.000399 | 0.000133 | 0        | 0        | 0        |

| IL-10 | IFN $\alpha$ | TNF $\alpha$ | IFN $\gamma$ |
|-------|--------------|--------------|--------------|
| 1.41  | 0.18         | 2.74         | 1.04         |
| 3.03  | 2.77         | 2.17         | 5.55         |
| 1.78  | 0.6          | 2.01         | 2.38         |
| 3.47  | 2.1          | 1.84         | 3.16         |
| 3.11  | 11.96        | 7.96         | 1.34         |
| 4.22  | 2.37         | 2.73         | 4.57         |
| 5.12  | 3.83         | 5.37         | 3.68         |
| 6.51  | 2.21         | 2.49         | 6.88         |
| 5.47  | 3.9          | 4.53         | 5.18         |
| 2.81  | 2.51         | 1.35         | 1.72         |
| 3.44  | 1.42         | 2.92         | 2.32         |
| 2.01  | 1.24         | 1.27         | 3.27         |
| 2.45  | 5.06         | 2.31         | 1.9          |
| 4.06  | 3.83         | 2.82         | 7.63         |
| 4.14  | 1.05         | 2.73         | 3.01         |
| 4.83  | 2.86         | 2.03         | 6.43         |
| 3.48  | 3.48         | 2.41         | 3.97         |
| 2.52  | 2.4          | 2.3          | 3.42         |

|       |       |       |       |
|-------|-------|-------|-------|
| 7.86  | 1.78  | 0.79  | 1.87  |
| 3.25  | 1.27  | 2.28  | 3.84  |
| 2.08  | 1.61  | 1.24  | 1.96  |
| 3.69  | 2     | 1.65  | 2.74  |
| 2.6   | 7.65  | 7.44  | 5.65  |
| 3.05  | 0.01  | 1.51  | 3.63  |
| 3.755 | 0.84  | 2.01  | 2.84  |
| 3.27  | 2.3   | 2.38  | 3.54  |
| 3.52  | 0.01  | 1.13  | 1.02  |
| 1.93  | 2.43  | 2.98  | 0.8   |
| 21.42 | 1.99  | 2.04  | 3.53  |
| 3.91  | 2.71  | 3.51  | 4.39  |
| 5.11  | 3.78  | 5.3   | 5.63  |
| 3.37  | 1.65  | 1.88  | 4.21  |
| 3.44  | 1.79  | 4.13  | 3.51  |
| 3.44  | 1.79  | 4.13  | 3.51  |
| 1.6   | 0.01  | 0.01  | 1.99  |
| 5.56  | 4.86  | 3.71  | 5.23  |
| 3.27  | 3.4   | 2.05  | 0.22  |
| 3.05  | 3.77  | 4.32  | 2.11  |
| 5.69  | 2.28  | 3.08  | 4.15  |
| 2.32  | 1.86  | 1.27  | 9.81  |
| 3.27  | 4.03  | 5.38  | 3.45  |
| 8.49  | 1.61  | 2.1   | 2.72  |
| 5.42  | 1.91  | 2.69  | 4.77  |
| 2.37  | 1.36  | 1.11  | 1.16  |
| 4.37  | 3.83  | 4.42  | 3.9   |
| 3.34  | 1.25  | 1.55  | 2.76  |
| 4.87  | 2.77  | 2.43  | 4.75  |
| 3.39  | 2.05  | 2.61  | 3.74  |
| 1.31  | 2.7   | 4.49  | 3.5   |
| 3.39  | 2.74  | 1.27  | 5.5   |
| 6.6   | 42.43 | 31.38 | 48.16 |
| 2.94  | 2.48  | 1.97  | 2.87  |
| 8.03  | 5.33  | 3.30  | 10.13 |
| 3.39  | 2.05  | 1.21  | 1.37  |
| 2.06  | 0.99  | 0.33  | 6.78  |
| 2.06  | 0.99  | 0.33  | 6.78  |
| 4.76  | 3.83  | 7.11  | 12.54 |
| 3.88  | 2.42  | 2.67  | 7.13  |
| 4.06  | 3.49  | 1.00  | 3.64  |
| 11.62 | 2.06  | 2.18  | 2.98  |
| 3.49  | 2.23  | 0.98  | 2.99  |
| 1.76  | 125.8 | 104.4 | 3.41  |
| 1.47  | 2.22  | 1.71  | 1.7   |
| 1.93  | 1     | 1.43  | 3.28  |
| 1.03  | 1.2   | 2.01  | 1.2   |
| 2.28  | 1.58  | 1.49  | 1.71  |
| 2.85  | 1.36  | 0.61  | 1.27  |
| 2.94  | 3.23  | 2.18  | 24.02 |
| 4.71  | 9.58  | 3.64  | 6.17  |
| 4.92  | 6.08  | 4.56  | 7.06  |
| 1.91  | 0.93  | 0.66  | 2.44  |
| 2.05  | 1.27  | 0.43  | 2.09  |
| 7.02  | 13.1  | 13.1  | 5.31  |
| 1.88  | 1.32  | 2.01  | 1.32  |
| 6.67  | 60.16 | 3.16  | 6.88  |
| 4.31  | 5.84  | 3.77  | 4.37  |

|       |       |       |       |
|-------|-------|-------|-------|
| 1.87  | 0.01  | 0.56  | 3.3   |
| 2.33  | 0.96  | 1.21  | 3.4   |
| 2.56  | 1.41  | 2.05  | 1.19  |
| 3.44  | 3.8   | 3.16  | 5.63  |
| 3.97  | 2.05  | 2.67  | 2.78  |
| 5.02  | 5.7   | 4.28  | 3.3   |
| 1.56  | 1.31  | 0.01  | 4.21  |
| 3.65  | 3.09  | 4.84  | 6.71  |
| 3.32  | 2.68  | 3.58  | 3.73  |
| 2.61  | 1.03  | 10.08 | 1.67  |
| 3.57  | 1.56  | 1.88  | 2.03  |
| 2.9   | 2.55  | 0.98  | 1.79  |
| 5.18  | 3.85  | 4.94  | 10.94 |
| 1.5   | 1.09  | 1.67  | 1.82  |
| 2.65  | 0.01  | 0.16  | 0.01  |
| 4.07  | 3.93  | 3.3   | 9.22  |
| 6.01  | 2.74  | 2.87  | 3.5   |
| 2.88  | 1.96  | 2.2   | 2.08  |
| 4.12  | 1.73  | 1.1   | 2.9   |
| 1.35  | 1.86  | 1.58  | 0.27  |
| 1.35  | 1.86  | 1.58  | 0.27  |
| 3.69  | 1.38  | 2.49  | 5.01  |
| 3.75  | 2.59  | 1.19  | 1.84  |
| 5.53  | 1.47  | 1.81  | 1.34  |
| 1.99  | 0.85  | 1.21  | 6.04  |
| 4.54  | 3.42  | 6.12  | 4.17  |
| 01    | 0.01  | 0.01  | 0.01  |
| 3.78  | 1.88  | 1.24  | 7.28  |
| 5.38  | 3.73  | 2.23  | 5.28  |
| 4.51  | 19.7  | 17.21 | 3.77  |
| 3.95  | 3.77  | 2.45  | 5.61  |
| 1.11  | 0.01  | 0.81  | 0.01  |
| 5.3   | 3.73  | 3.51  | 5.01  |
| 2.95  | 1.09  | 0.98  | 1.05  |
| 3.48  | 2.1   | 2.9   | 3.8   |
| 4.5   | 3.93  | 5.78  | 6.17  |
| 3.77  | 2.89  | 0.99  | 3.01  |
| 4.91  | 4.28  | 3.07  | 4.71  |
| 4.04  | 2.28  | 3.44  | 1.95  |
| 7.75  | 3.85  | 2.06  | 5.55  |
| 3.85  | 2.06  | 1.24  | 2.99  |
| 4.14  | 2.14  | 2.68  | 3.4   |
| 3.39  | 2.06  | 1.69  | 3.45  |
| 107.1 | 4.28  | 3.83  | 4.64  |
| 4.42  | 1.92  | 2.29  | 1.5   |
| 2.91  | 5.78  | 8.2   | 4.34  |
| 2.57  | 1.56  | 1.03  | 1.01  |
| 7.86  | 14.54 | 9.55  | 6.46  |
| 1.99  | 2.27  | 1.35  | 1.99  |
| 4.47  | 1.75  | 1.02  | 2.99  |
| 1.93  | 1.09  | 2.23  | 1.16  |
| 3.47  | 1.62  | 0.91  | 1.56  |
| 5.24  | 11.43 | 13.42 | 4.11  |
| 5.29  | 2.67  | 3.75  | 4.81  |
| 3.39  | 1.78  | 1.03  | 2.46  |
| 25.36 | 2.35  | 3.73  | 9.35  |
| 7.56  | 1.93  | 2.84  | 4.59  |
| 4.73  | 1.96  | 2.21  | 2.53  |

|      |       |       |      |
|------|-------|-------|------|
| 10.1 | 28.9  | 12.02 | 6.79 |
| 2.47 | 1.2   | 5.42  | 3.42 |
| 2.26 | 1.91  | 4.11  | 1.77 |
| 1.99 | 2.97  | 1.23  | 4.65 |
| 3.18 | 3.41  | 3.85  | 5.72 |
| 2.15 | 1.61  | 1.51  | 2.11 |
| 3.44 | 2.29  | 1.77  | 2.04 |
| 6.06 | 10.32 | 7.72  | 3.59 |
| 0.56 | 0.01  | 1.19  | 3.05 |
| 6.07 | 11.79 | 7.2   | 6.79 |
| 2.54 | 2.54  | 2.43  | 1.8  |
| 4.32 | 2.65  | 4.42  | 3.9  |
| 1.23 | 0.5   | 1.03  | 2.46 |
| 3.46 | 0.01  | 1.11  | 1.88 |
| 3.18 | 1.67  | 1.22  | 3.69 |
| 6.42 | 0.01  | 0.79  | 2.58 |
| 3.39 | 2.19  | 2.89  | 2.81 |
| 3.27 | 0.38  | 0.95  | 0.80 |
| 3.29 | 1.44  | 0.68  | 4.75 |
| 2.76 | 2.59  | 2.89  | 1.76 |
| 4.83 | 2.21  | 1.71  | 1.32 |
| 2.21 | 0.9   | 2.92  | 2.24 |
| 2.95 | 8.61  | 7.06  | 3.62 |





























DSS+DCA

| 100      | 100      | 100      | 100      | 100      | 100      | 100      |
|----------|----------|----------|----------|----------|----------|----------|
| 109.0395 | 115.8192 | 106.7039 | 107.6923 | 104.3243 | 106.0109 | 108.0645 |
| 110.1695 | 116.3842 | 106.1453 | 109.3407 | 104.8649 | 107.1038 | 108.6022 |
| 105.6497 | 109.0395 | 102.7933 | 103.8462 | 101.0811 | 104.3716 | 104.8387 |
| 102.2599 | 107.3446 | 104.4693 | 107.1429 | 102.7027 | 106.0109 | 104.3011 |
| 101.6949 | 105.6497 | 102.7933 | 97.8022  | 95.67568 | 94.53552 | 96.77419 |
| 102.2599 | 105.0847 | 101.676  | 86.26374 | 96.75676 | 92.89617 | 94.62366 |
| 93.22034 | 97.17514 | 91.62011 | 80.21978 | 92.43243 | 86.88525 | 89.78495 |
| 94.35028 | 93.78531 | 91.06145 | 76.37363 | 90.81081 | 88.52459 | 87.63441 |
| 87.8453  | 86.55914 | 82.96703 | 0*       | 96.64804 | 92.35294 | 80.68182 |
| 89.83051 | 92.65537 | 82.68156 | 0*       | 95.13514 | 89.61749 | 71.50538 |
| 93.78531 | 97.74011 | 87.7095  | 0*       | 94.05405 | 93.98907 | 0*       |



| WW1      | WW2      | WW3      |
|----------|----------|----------|
| 0        | 0        | 0        |
| 0.020897 | 0.007321 | 0.013177 |
| 0.074005 | 0.048582 | 0.050579 |
| 0.000799 | 0.000932 | 0        |
| 0.000266 | 0.000133 | 0        |
| 0.850659 | 0.891255 | 0.881139 |
| 0.052975 | 0.051644 | 0.054705 |
| 0        | 0        | 0        |
| 0.000399 | 0.000133 | 0.000399 |
| 0        | 0        | 0        |
